# Supplementary material for: The Taxonomic and Functional Diversity of Microbes at a Temperate Coastal Site: A ‘Multi-Omic’ Study of Seasonal and Diel Temporal Variation
Source: PLoS One. 2010 Nov 29;5(11):e15545. doi: 10.1371/journal.pone.0015545 (PMC2993967; doi:10.1371/journal.pone.0015545)
Supplement: Table S6 — SIMPER analysis of the contribution of different functional genes to dissimilarities between day and night samples in April for the metagenomic samples annotated against the Hierarchy 1 SEED subsystem database. All data were randomly re-sampled prior to analysis and the abundances were transformed by square root. Av.Abund – square root of average abundance; Contrib% - individual % contribution of that metabolic function to the dissimilarities between samples; Cum.% - Cumulative % contribution of metabolic functions to dissimilarities between samples. (XLSX) [file pone.0015545.s010.xlsx]

## Sheet: Sheet1
Functional category	April Day Av.Abund.	April Night Av.Abund.	Contrib%	Cum.%
Photosystem_II	4.47	35.07	2.41	2.41
Cytochrome_B6-F_complex	2.83	26.12	1.83	4.24
Photosystem_I	3	13.56	0.83	5.08
Choline_and_Betaine_Uptake_and_Betaine_Biosynthesis	33.84	23.64	0.8	5.88
CBSS-188.1.peg.6170	20.93	11.4	0.75	6.63
Histidine_Degradation	12.92	21.54	0.68	7.31
Respiratory_Complex_I	34.73	26.38	0.66	7.97
Glutaredoxins	28.09	20.17	0.62	8.59
CBSS-49338.1.peg.459	27.4	19.75	0.6	9.19
CBSS-345072.3.peg.1318	13.67	21.07	0.58	9.77
Glycolate,_glyoxylate_interconversions	24.72	17.41	0.58	10.35
D-ribose_utilization	22.93	15.65	0.57	10.92
CBSS-269799.3.peg.2220	13.93	21.17	0.57	11.49
Na(+)-translocating_NADH-quinone_oxidoreductase_and_rnf-like_group_of_electron_transport_complexes	15.46	22.63	0.56	12.06
Menaquinone_and_Phylloquinone_Biosynthesis	15.81	22.91	0.56	12.62
ABC_transporter_branched-chain_amino_acid_(TC_3.A.1.4.1)	23.54	17.2	0.5	13.12
Experimental_-Creatinine_degradation	17.12	10.86	0.49	13.61
Folate_Biosynthesis	31.05	36.99	0.47	14.08
Pyrimidine_utilization	17.38	11.49	0.46	14.54
Mannose_Metabolism	14.97	20.81	0.46	15
Hfl_operon	12.73	6.93	0.46	15.46
Alginate_metabolism	10.82	16.61	0.46	15.91
Polyamine_Metabolism	21.52	15.78	0.45	16.37
Ton_and_Tol_transport_systems	34.7	40.35	0.44	16.81
Propionate-CoA_to_Succinate_Module	15.07	9.43	0.44	17.25
PmbA_and_a_Hypothetical_Protein	13.08	7.55	0.44	17.69
Glycine_and_Serine_Utilization	13.08	18.52	0.43	18.12
DNA_Repair_Base_Excision	21.89	16.46	0.43	18.55
Ribosome_SSU_chloroplast	0	5.39	0.42	18.97
CBSS-198094.1.peg.4426	5.1	10.39	0.42	19.39
CBSS-316273.3.peg.227	14.83	9.59	0.41	19.8
dTDP-rhamnose_synthesis	16.22	21.42	0.41	20.21
Glycerol_and_Glycerol-3-phosphate_Uptake_and_Utilization	24.25	19.13	0.4	20.61
RNA_polymerase_chloroplast	2.24	7.35	0.4	21.01
Ribosome_LSU_chloroplast	2.65	7.75	0.4	21.42
Glycerate_metabolism	21.14	16.06	0.4	21.82
Hydantoin_metabolism	18.76	13.71	0.4	22.21
YgfZ-Fe-S	17.52	12.49	0.4	22.61
DMSP_breakdown	13.75	8.72	0.4	23.01
Inositol_catabolism	18.38	13.42	0.39	23.4
CBSS-205922.3.peg.1809	15.1	10.25	0.38	23.78
Arginine_Biosynthesis	28.46	23.66	0.38	24.16
Methionine_Biosynthesis	33.56	28.77	0.38	24.53
Ribitol,_Xylitol,_Arabitol,_Mannitol_and_Sorbitol_utilization	17.35	12.61	0.37	24.91
tRNA_aminoacylation	54.2	58.92	0.37	25.28
Transport_of_Manganese	10.15	14.76	0.36	25.64
Threonine_degradation	11.49	16.09	0.36	26.01
Coenzyme_B12_biosynthesis	25.18	20.59	0.36	26.37
Cellulosome	9.27	13.86	0.36	26.73
YeiH	4.58	0	0.36	27.09
CBSS-258594.1.peg.3339	24.45	28.91	0.35	27.44
Sulfur_oxidation	18.95	14.49	0.35	27.79
Multidrug_Resistance_Efflux_Pumps	18.33	22.78	0.35	28.14
Ubiquinone_Menaquinone-cytochrome_c_reductase_complexes	18.06	13.67	0.35	28.49
CBSS-320372.3.peg.6046	12.25	7.87	0.34	28.83
Asp-tRNA(Asn)_transamidation	24.25	19.92	0.34	29.17
CBSS-316057.3.peg.659	7.68	12	0.34	29.51
Branched_chain_amino_acid_degradation_regulons	19.13	14.93	0.33	29.84
Cobalt-zinc-cadmium_resistance	18.89	23.09	0.33	30.17
Staphylococcal_pathogenicity_islands_SaPI	8.49	12.65	0.33	30.5
GABA_and_putrescine_metabolism_from_cluters	16.4	12.29	0.32	30.82
Bacterial_motility:Gliding	18.03	22.14	0.32	31.15
Acetoin,_butanediol_metabolism	14.21	10.15	0.32	31.47
Urea_decomposition	16.46	12.45	0.32	31.78
Chitin_and_N-acetylglucosamine_utilization	10.3	14.28	0.31	32.1
Iron-sulfur_experimental	38.73	34.76	0.31	32.41
Taurine_Utilization	10.3	6.32	0.31	32.72
Sucrose_Metabolism	21.84	25.77	0.31	33.03
CBSS-243277.1.peg.511	16.61	12.69	0.31	33.34
ABC_transporter_dipeptide_(TC_3.A.1.5.2)	13.11	17	0.31	33.65
DNA-replication	41.1	44.98	0.31	33.95
ABC_transporter_glutamine_(TC_3.A.1.3.2)	7.81	4	0.3	34.25
CBSS-266117.6.peg.2476	14.66	10.86	0.3	34.55
Two-component_sensor_regulator_linked_to_Carbon_Starvation_Protein_A	1	4.8	0.3	34.85
Siderophore_enterobactin_biosynthesis_and_ferric_enterbactin_transport	4.9	8.6	0.29	35.14
Ribosome_biogenesis_bacterial	20.57	24.21	0.29	35.43
CBSS-323098.3.peg.2823	13.04	16.67	0.29	35.72
Protein_chaperones	24.7	21.07	0.29	36
Galactosylceramide_and_Sulfatide_metabolism	13.3	16.85	0.28	36.28
ABC_transporter_oligopeptide_(TC_3.A.1.5.1)	19.34	15.81	0.28	36.56
Conenzyme_B12_related_Hypothetical:_Clusters_with_cobST	9.11	5.66	0.27	36.83
Fermentations:_Mixed_acid	8.83	5.39	0.27	37.1
Aminotransferases:Aromatic_Pathway_and_More,_A_work_in_progress	9.59	6.16	0.27	37.37
Beta-lactamase	13.3	16.7	0.27	37.64
CBSS-314267.3.peg.390	6.86	10.25	0.27	37.91
Salicylate_and_gentisate_catabolism	9.22	5.83	0.27	38.18
Dimethylarginine_metabolism	7.48	10.86	0.27	38.44
Tn552	1.73	5.1	0.27	38.71
Outer_membrane	11.4	14.76	0.26	38.97
CBSS-314225.3.peg.515	11.4	8.06	0.26	39.23
Leucine_Degradation_and_HMG-CoA_Metabolism	3.74	7.07	0.26	39.5
rRNA_modification_Bacteria	6.63	9.95	0.26	39.76
CBSS-89187.3.peg.2957	12.08	8.77	0.26	40.02
DNA_repair,_bacterial	36.44	39.75	0.26	40.28
Pyoverdine_biosynthesis_new	8.77	5.48	0.26	40.54
DNA_repair,_bacterial_RecFOR_pathway	18.17	21.45	0.26	40.8
Competence_or_DNA_damage-inducible_protein_CinA_and_related_protein_families	18.25	14.97	0.26	41.06
Sulfate_reduction-associated_complexes	4.69	1.41	0.26	41.31
Methylcitrate_cycle	9.75	6.48	0.26	41.57
Two_cell_division_clusters_relating_to_chromosome_partitioning	16.67	13.42	0.26	41.83
Butanol_Biosynthesis	28.34	31.59	0.26	42.08
Experimental-Ubiquinone_BiosynthesisVDC	25.96	22.74	0.25	42.34
CBSS-138119.3.peg.2719	17.29	14.07	0.25	42.59
Chorismate_Synthesis	15.13	11.92	0.25	42.84
Resistance_to_fluoroquinolones	24.58	27.78	0.25	43.1
Pyruvate_metabolism_II:_acetyl-CoA,_acetogenesis_from_pyruvate	31.4	28.2	0.25	43.35
Tryptophan_synthesis	21.17	17.97	0.25	43.6
CBSS-323850.3.peg.3284	10.95	14.14	0.25	43.85
Trehalose_Uptake_and_Utilization	4.12	7.28	0.25	44.1
ATP-dependent_RNA_helicases,_bacterial	17.49	20.64	0.25	44.35
CBSS-393121.3.peg.2760	28.62	31.76	0.25	44.6
CBSS-316279.3.peg.746	10.05	13.19	0.25	44.84
Glycine_Biosynthesis	11.36	14.49	0.25	45.09
Benzoate_degradation	8.6	5.48	0.25	45.34
Glyoxylate_Synthesis	6.78	9.9	0.25	45.58
Molybdopterin_biosynthesis	16.52	13.42	0.24	45.83
Hydrogenases	8.49	5.39	0.24	46.07
Stringent_Response,_(p)ppGpp_metabolism	4.9	7.94	0.24	46.31
NAD_regulation	7.07	10.1	0.24	46.55
Glutamine_synthetases	11.49	8.49	0.24	46.79
CBSS-52598.3.peg.2843	0	3	0.24	47.02
Sulfatases_and_sulfatase_modifying_factor_1	10.95	13.93	0.23	47.26
Methionine_Salvage	8.89	5.92	0.23	47.49
Zinc_regulated_enzymes	9.64	12.61	0.23	47.72
Valine_degradation	12.04	14.93	0.23	47.95
Utilization_of_glutathione_as_a_sulphur_source	14.35	11.49	0.23	48.18
A_Gammaproteobacteria_Cluster_Relating_to_Translation	7.94	5.1	0.22	48.4
Bilin_Biosynthesis	0	2.83	0.22	48.62
Ribosome_LSU_mitochondrial	0	2.83	0.22	48.85
Sucrose_utilization_Shewanella	1.41	4.24	0.22	49.07
tRNA_modification_E.coli	26.38	23.56	0.22	49.29
Biolumenescence	6.4	3.61	0.22	49.51
Oxidative_stress	20.17	22.96	0.22	49.73
Heat_shock_dnaK_gene_cluster_extended	19.52	22.29	0.22	49.95
DNA-binding_regulatory_proteins,_strays	7.55	4.8	0.22	50.17
Xylose_utilization	12.77	15.49	0.21	50.38
Alanine_biosynthesis	10.72	8	0.21	50.59
Homogentisate_pathway_of_aromatic_compound_degradation	10.1	12.81	0.21	50.81
Thiamin_biosynthesis	20.12	17.44	0.21	51.02
Entner-Doudoroff_Pathway	24.08	26.76	0.21	51.23
2-methylcitrate_to_2-methylaconitate_metabolism_cluster	5.83	3.16	0.21	51.44
ECF_class_transporters	8.12	5.48	0.21	51.65
methanopterin_biosynthesis	2.65	0	0.21	51.86
Prophage_lysogenic_conversion_modules	0	2.65	0.21	52.07
4-Hydroxyphenylacetic_acid_catabolic_pathway	5.2	7.81	0.21	52.27
Ribosome_SSU_mitochondrial	1	3.61	0.21	52.48
Selenocysteine_metabolism	5.39	2.83	0.2	52.68
Experimental-FO	7.21	4.69	0.2	52.88
Fermentations:_Lactate	13.67	11.18	0.2	53.07
Aromatic_amino_acid_degradation	8.31	5.83	0.19	53.27
CBSS-251221.1.peg.1863	13.38	10.91	0.19	53.46
Cobalamin_synthesis	5.1	2.65	0.19	53.66
CBSS-257314.1.peg.752	10	7.55	0.19	53.85
Lactose_utilization	0	2.45	0.19	54.04
CBSS-320388.3.peg.3759	0	2.45	0.19	54.23
Flagellum	20.22	22.63	0.19	54.42
Alkaloid_biosynthesis_from_L-lysine	6	3.61	0.19	54.61
ABC_transporter_ferrichrome_(TC_3.A.1.14.3)	1.73	4.12	0.19	54.8
Acetyl-CoA_fermentation_to_Butyrate	20.71	18.33	0.19	54.99
One-carbon_metabolism_by_tetrahydropterines	8.12	5.74	0.19	55.18
D-galactonate_catabolism	5	2.65	0.19	55.36
CBSS-316057.3.peg.563	6.71	4.36	0.19	55.55
ABC_transporter_Iron_(II)_and_Manganese	7.35	5	0.18	55.73
n-Phenylalkanoic_acid_degradation	4.8	2.45	0.18	55.92
Di-Inositol-Phosphate_biosynthesis	5.66	3.32	0.18	56.1
Thioredoxin-disulfide_reductase	16	18.33	0.18	56.28
Translation_factors_bacterial	20.1	22.43	0.18	56.47
Formate_hydrogenase	17.64	15.33	0.18	56.65
Arginine_and_Ornithine_Degradation	10.54	8.25	0.18	56.83
Glu-tRNA(Gln)_transamidation	7.94	5.66	0.18	57.01
tRNA_processing	24.17	26.44	0.18	57.19
ABC_transporter_glutamate_aspartate_(TC_3.A.1.3.4)	4	1.73	0.18	57.37
CBSS-83332.1.peg.3803	30.95	28.69	0.18	57.54
Campylobacter_Iron_Metabolism	13.53	11.27	0.18	57.72
CBSS-221988.1.peg.771	6	8.25	0.18	57.9
Bacterial_Cytoskeleton	36.84	39.08	0.18	58.08
RuvABC_plus_a_hypothetical	15.03	17.26	0.18	58.25
O-Methyl_Phosphoramidate_Capsule_Modification_in_Campylobacter	9.64	7.42	0.18	58.43
Transcription_initiation,_bacterial_sigma_factors	16.73	14.53	0.17	58.6
F0F1-type_ATP_synthase	26.78	28.98	0.17	58.77
LOS_core_oligosaccharide_biosynthesis	12.25	10.05	0.17	58.95
Isoprenoid_Biosynthesis	27.98	25.79	0.17	59.12
Major_Outer_Membrane_Proteins	10.34	12.53	0.17	59.29
CBSS-290633.1.peg.1906	8.66	6.48	0.17	59.46
Sugar_catabolome_in_Shewanella_species	11.4	13.56	0.17	59.63
PnuC-like_transporters	3.16	1	0.17	59.8
CBSS-354.1.peg.2917	6.63	4.47	0.17	59.98
YgfZ	20.25	22.41	0.17	60.15
CBSS-342610.3.peg.1794	10.86	13	0.17	60.31
CBSS-218491.3.peg.427	22.83	24.96	0.17	60.48
ABC_transporter_alkylphosphonate_(TC_3.A.1.9.1)	8.83	6.71	0.17	60.65
CBSS-316057.3.peg.1294	11.92	14.04	0.17	60.82
Fructose_utilization	7.68	5.57	0.17	60.98
Transporters_In_Models	17.44	19.54	0.17	61.15
Proteorhodopsin	11.05	8.94	0.17	61.31
Lysine_degradation	11.83	13.93	0.17	61.48
Carotenoids	22.14	24.23	0.16	61.64
YjeE	11.4	9.33	0.16	61.81
CBSS-243277.1.peg.4359	13.82	11.75	0.16	61.97
Listeria_surface_proteins:_Internalin-like_proteins	5.48	7.55	0.16	62.13
Threonine_and_Homoserine_Biosynthesis	25.08	23.02	0.16	62.3
Lipoprotein_Biosynthesis	10.68	12.73	0.16	62.46
KDO2-Lipid_A_biosynthesis	30.05	32.09	0.16	62.62
Triacylglycerol_metabolism	6.16	4.12	0.16	62.78
Vibrio_Polysaccharide_(VPS)_Biosynthesis	3.16	5.2	0.16	62.94
Flavanone_biosynthesis	3.46	5.48	0.16	63.1
mycolic_acid_synthesis	3.74	1.73	0.16	63.26
Folate_transporters	6.24	8.25	0.16	63.41
Biotin_biosynthesis	14.25	12.25	0.16	63.57
Cell_Division_Cluster	2	0	0.16	63.73
DNA_topoisomerases,_Type_II,_ATP-dependent	14	12	0.16	63.89
Chloroaromatic_degradation_pathway	2	0	0.16	64.04
Pyrrolysine	2	0	0.16	64.2
Group_II_intron-associated_genes	9	11	0.16	64.36
Quorum_sensing_in_Yersinia	2	0	0.16	64.52
Flavocytochrome_C	0	2	0.16	64.67
Naphtalene_and_antracene_degradation	4.8	2.83	0.15	64.83
YaaA	7.42	9.38	0.15	64.98
CBSS-176299.3.peg.235	7.62	5.66	0.15	65.14
Universal_GTPases	35.2	37.15	0.15	65.29
Protocatechuate_branch_of_beta-ketoadipate_pathway	8.43	6.48	0.15	65.44
Transport_of_Nickel_and_Cobalt	8.72	6.78	0.15	65.6
Phenylpropanoid_compound_degradation	12.08	10.15	0.15	65.75
Histidine_Biosynthesis	29.93	28	0.15	65.9
CBSS-306254.1.peg.1508	10.3	8.37	0.15	66.05
Common_Pathway_For_Synthesis_of_Aromatic_Compounds_(DAHP_synthase_to_chorismate)	25.2	23.28	0.15	66.2
DNA_structural_proteins,_bacterial	10.34	8.43	0.15	66.36
Phycobilisome	1.41	3.32	0.15	66.51
Accessory_colonization_factor	1.41	3.32	0.15	66.65
Soluble_cytochromes_and_functionally_related_electron_carriers	9.85	11.75	0.15	66.8
CBSS-292415.3.peg.2341	7.81	5.92	0.15	66.95
Anaerobic_respiratory_reductases	20	18.11	0.15	67.1
Conserved_gene_cluster_possibly_involved_in_RNA_metabolism	4.36	6.24	0.15	67.25
Methylglyoxal_Metabolism	9.43	7.55	0.15	67.4
EC699-706	22.45	24.33	0.15	67.55
L-rhamnose_utilization	4.47	6.32	0.15	67.69
Lactate_utilization	11.79	9.95	0.14	67.84
CBSS-224911.1.peg.435	12.12	13.96	0.14	67.98
GJO_regulatory_system_scratch	5	3.16	0.14	68.13
CBSS-243265.1.peg.198	2.83	1	0.14	68.27
Type_4_conjugative_transfer_system,_IncI1_type	2.83	1	0.14	68.42
Glycogen_metabolism	3.74	5.57	0.14	68.56
tRNA_modification_Archaea_Henri	13.64	15.46	0.14	68.7
CBSS-326442.4.peg.1852	18.03	16.22	0.14	68.85
Ribosome_activity_modulation	6.71	4.9	0.14	68.99
High_affinity_phosphate_transporter_and_control_of_PHO_regulon	6.16	4.36	0.14	69.13
Glyoxylate_bypass	5.66	3.87	0.14	69.27
Putative_hemin_transporter	9.59	7.81	0.14	69.41
CBSS-281309.1.peg.50	27.89	29.66	0.14	69.55
Benzoate_transport_and_degradation_cluster	6	4.24	0.14	69.69
ABC_transporter_iron(III)_dicitrate_(TC_3.A.1.14.1)	1.41	3.16	0.14	69.83
CBSS-261591.3.peg.3916	17.46	15.72	0.14	69.96
Orphan_regulatory_proteins	5.2	3.46	0.14	70.1
D-Sorbitol(D-Glucitol)_and_L-Sorbose_Utilization	1.73	0	0.14	70.24
Methanogenesis	0	1.73	0.14	70.37
Sortase	0	1.73	0.14	70.51
CBSS-216592.1.peg.3534	0	1.73	0.14	70.65
CBSS-196620.1.peg.2477	1.73	0	0.14	70.78
Putative_sulfate_assimilation_cluster	0	1.73	0.14	70.92
YbbK	1.73	0	0.14	71.06
Translation_elongation_factors_eukaryotic_and_archaeal	0	1.73	0.14	71.19
Transcription_factors_cyanobacterial_RpoD-like_sigma_factors	0	1.73	0.14	71.33
Coenzyme_F420-H2_dehydrogenase_(methanophenazine)	1.73	0	0.14	71.47
CBSS-412883.3.peg.390	1.73	0	0.14	71.6
Adhesion_of_Campylobacter	1.73	0	0.14	71.74
Pseudomonas_quinolone_signal_PQS	0	1.73	0.14	71.87
Hexitol_degradation	10.72	12.45	0.14	72.01
Flavohaemoglobin	11.05	9.33	0.14	72.15
YgfZ-Fe-S_clustering	9.9	8.19	0.14	72.28
Unsaturated_Fatty_Acid_Metabolism	6.4	4.69	0.13	72.42
Late_competence	4.12	5.83	0.13	72.55
YrdC-YciO	12.04	10.34	0.13	72.68
Nitric_oxide_synthase	4.69	3	0.13	72.82
Ribosome_LSU_bacterial	32.51	30.82	0.13	72.95
Redox-dependent_regulation_of_nucleus_processes	4.8	6.48	0.13	73.08
DNA_repair,_UvrABC_system	29.56	31.24	0.13	73.21
eukaryotic_rRNA_modification_and_related_functions	4.12	2.45	0.13	73.35
Proteasome_eukaryotic	4.58	6.24	0.13	73.48
Copper_homeostasis:_copper_tolerance	4.9	6.56	0.13	73.61
Aromatic_Amin_Catabolism	11.53	13.19	0.13	73.74
Heme,_hemin_uptake_and_utilization_systems_in_GramPositives	4	5.66	0.13	73.87
2-Ketogluconate_Utilization	2.65	1	0.13	74
Nitrosative_stress	1	2.65	0.13	74.13
Pseudaminic_Acid_Biosynthesis	3.87	2.24	0.13	74.26
Mannitol_Utilization	6.32	4.69	0.13	74.39
Type_I_Restriction-Modification	3.16	4.8	0.13	74.51
Zinc_resistance	8.54	6.93	0.13	74.64
RNA_polymerase_II	7	5.39	0.13	74.77
Conserved_gene_cluster_associated_with_Met-tRNA_formyltransferase	18.79	20.4	0.13	74.9
Fructooligosaccharides(FOS)_and_Raffinose_Utilization	3.61	2	0.13	75.02
Murein_hydrolase_regulation_and_cell_death	3.61	5.2	0.13	75.15
Ketoisovalerate_oxidoreductase	3	4.58	0.12	75.27
CBSS-316407.3.peg.2816	4.9	3.32	0.12	75.4
trimethylamine_N-oxide_(TMAO)_reductase	4.9	3.32	0.12	75.52
ABC_transporter_tungstate_(TC_3.A.1.6.2)	8.06	6.48	0.12	75.65
Proteasome_bacterial	26.87	25.3	0.12	75.77
Queuosine-Archaeosine_Biosynthesis	25.34	23.77	0.12	75.89
COG1272_Experimental	5	6.56	0.12	76.02
CBSS-312309.3.peg.1965	16.09	14.56	0.12	76.14
CBSS-269801.1.peg.1715	6.32	4.8	0.12	76.26
RNA_processing_and_degradation,_bacterial	20.54	22.07	0.12	76.38
Nudix_proteins_(nucleoside_triphosphate_hydrolases)	11.92	10.39	0.12	76.5
USS-DB-7	2.24	3.74	0.12	76.62
Exopolysaccharide_Biosynthesis	3.61	5.1	0.12	76.73
Glutathione-regulated_potassium-efflux_system_and_associated_functions	24.54	26.02	0.12	76.85
CBSS-246196.1.peg.364	23.66	22.18	0.12	76.97
Bacterial_Cell_Division	22.07	20.59	0.12	77.08
Polyhydroxybutyrate_metabolism	14.73	13.27	0.12	77.2
Integrons	2	3.46	0.12	77.31
Methicillin_resistance_in_Staphylococci	3.46	2	0.12	77.43
YgjD_and_YeaZ	8.54	10	0.11	77.54
Phosphoglycerate_transport_system	1	2.45	0.11	77.66
Membrane-bound_Ni,_Fe-hydrogenase	1	2.45	0.11	77.77
Teicoplanin-resistance_in_Staphylococcus	2.45	1	0.11	77.89
Hemin_transport_system	6.24	4.8	0.11	78
Bacterial_Chemotaxis	12.45	13.89	0.11	78.11
General_secretory_pathway_(Sec-SRP)_complex_(TC_3.A.5.1.1)	26.12	24.68	0.11	78.23
Core_Oligosaccharide_Glycosylation_in_Pseudomonas	4.9	3.46	0.11	78.34
HPr_catabolite_repression_system	3.16	1.73	0.11	78.45
USS-DB-6	1.73	3.16	0.11	78.57
Respiratory_dehydrogenases_1	22.05	20.62	0.11	78.68
Teichuronic_acid_biosynthesis	7.68	9.11	0.11	78.79
Universal_stress_protein_family	2.45	3.87	0.11	78.9
CBSS-83331.1.peg.3039	22.89	24.31	0.11	79.01
Ribosome_SSU_bacterial	25.1	23.69	0.11	79.13
Capsular_Polysaccharide_(CPS)_of_Campylobacter	1.41	2.83	0.11	79.24
CBSS-176279.3.peg.1262	2.83	1.41	0.11	79.35
CBSS-237727.3.peg.501	1.41	0	0.11	79.46
PA0057_cluster	1.41	0	0.11	79.57
Tocopherol_Biosynthesis	1.41	0	0.11	79.68
Archease2	1.41	0	0.11	79.79
Motility_of_Campylobacter	1.41	0	0.11	79.91
Spliceosome	0	1.41	0.11	80.02
Wyeosine-MimG_Biosynthesis	0	1.41	0.11	80.13
RNA_polymerase_III_initiation_factors	0	1.41	0.11	80.24
RNA_polymerase_II_initiation_factors	1.41	2.83	0.11	80.35
Fosfomycin_resistance	1.41	0	0.11	80.46
CR_clusters_Euk_6_lactateDehB	0	1.41	0.11	80.57
Polysaccharide_deacetylases	1.41	0	0.11	80.69
Staphylococcus_aureus_hypothetical_repetitive_gene_loci	0	1.41	0.11	80.8
Tetracycline_resistance,_ribosome_protection_type	1.41	0	0.11	80.91
Cholera_toxin	0	1.41	0.11	81.02
C_jejuni_colonization_of_chick_caeca	2.83	1.41	0.11	81.13
CBSS-160492.1.peg.550	9.59	11	0.11	81.24
Copper_homeostasis	20.62	19.21	0.11	81.35
CBSS-393123.3.peg.2365	6.78	5.39	0.11	81.46
CBSS-393121.3.peg.1913	14.8	16.19	0.11	81.57
Protection_from_Reactive_Oxygen_Species	4	5.39	0.11	81.68
CBSS-316057.3.peg.1308	23.02	24.39	0.11	81.79
2-phosphoglycolate_salvage	4.36	3	0.11	81.9
Biogenesis_of_cbb3-type_cytochrome_c_oxidases	2.65	4	0.11	82
Phosphate_metabolism	40.34	41.69	0.11	82.11
Heme_and_Siroheme_Biosynthesis	32.56	31.21	0.11	82.22
Periplasmic_disulfide_interchange	14.18	15.52	0.11	82.32
CBSS-258594.1.peg.613	16.82	18.17	0.11	82.43
Iojap	10.54	11.87	0.11	82.53
Lysine_Biosynthesis_DAP_Pathway	34.53	33.2	0.1	82.64
L-2-amino-thiazoline-4-carboxylic_acid-Lcysteine_conversion	6.32	5	0.1	82.74
Cyanate_hydrolysis	2	3.32	0.1	82.85
Bacterial_cyanide_production_and_tolerance_mechanisms	2	3.32	0.1	82.95
5-FCL-like_protein	16.67	15.36	0.1	83.05
Anaerobic_benzoate_metabolism	8.89	10.2	0.1	83.16
Branched-Chain_Amino_Acid_Biosynthesis	34.1	32.8	0.1	83.26
YHI9	5.92	7.21	0.1	83.36
Biogenesis_of_c-type_cytochromes	18.03	16.73	0.1	83.46
Sulfate_assimilation	9.64	8.37	0.1	83.56
Carbon_monoxide_induced_hydrogenase	5.66	6.93	0.1	83.66
CBSS-228410.1.peg.134	21.7	20.45	0.1	83.76
Succinate_dehydrogenase	14.97	13.71	0.1	83.86
Neotrehalosadiamine_(NTD)_Biosynthesis_Operon	2.24	1	0.1	83.96
Cresol_degradation	1	2.24	0.1	84.06
Sex_pheromones_in_Enterococcus_faecalis_and_other_Firmicutes	2.24	1	0.1	84.15
Hyperosmotic_ectoine_biosynthesis	2.24	1	0.1	84.25
Melibiose_Utilization	1.41	2.65	0.1	84.35
CBSS-393130.3.peg.129	2.65	1.41	0.1	84.44
CBSS-224911.1.peg.7673	2.65	1.41	0.1	84.54
Listeria_surface_proteins:_LPXTG_motif	1.41	2.65	0.1	84.64
Resistance_to_Vancomycin	2.65	3.87	0.1	84.73
Colanic_acid_biosynthesis	7.14	5.92	0.1	84.83
Pentose_phosphate_pathway	21.07	22.29	0.1	84.93
CBSS-83333.1.peg.946	8	6.78	0.1	85.02
CBSS-323097.3.peg.2594	12.37	11.18	0.09	85.12
General_Secretion_Pathway	8.25	7.07	0.09	85.21
Lactose_and_Galactose_Uptake_and_Utilization	15.62	14.46	0.09	85.3
Phenylpropionate_Degradation	3.16	2	0.09	85.39
CBSS-56780.10.peg.1536	16.25	17.41	0.09	85.48
Phytochromes	3.74	4.9	0.09	85.58
Caffeic_acid_derivatives	2.45	3.61	0.09	85.67
Phenylalanine_and_Tyrosine_Branches_from_Chorismate	13.23	12.12	0.09	85.75
Acriflavin_resistance_cluster	22.18	23.28	0.09	85.84
RNA_polymerase_III	2.83	1.73	0.09	85.93
L-fucose_utilization_temp	8.72	9.8	0.09	86.01
Ribonuclease_H	9.22	10.3	0.08	86.1
CBSS-235.1.peg.567	17.32	16.25	0.08	86.18
UDP-N-acetylmuramate_from_Fructose-6-phosphate_Biosynthesis	13.64	12.57	0.08	86.26
Inorganic_Sulfur_Assimilation	12.17	13.23	0.08	86.35
Cyanobacterial_Circadian_Clock	4.8	3.74	0.08	86.43
Translation_elongation_factor_G_family	8.12	7.07	0.08	86.51
Polyadenylation_bacterial	7.21	6.16	0.08	86.6
Type_III_secretion_system_orphans	3.32	4.36	0.08	86.68
Ribonucleotide_reduction	21.73	20.69	0.08	86.76
Methionine_Degradation	8.72	7.68	0.08	86.84
Toluene_degradation	2.45	1.41	0.08	86.92
Oxygen_and_light_sensor_PpaA-PpsR	1.41	2.45	0.08	87.01
Synthesis_of_osmoregulated_periplasmic_glucans	1.41	2.45	0.08	87.09
Mercuric_reductase	2.45	1.41	0.08	87.17
D-Galacturonate_Utilization	5.83	4.8	0.08	87.25
Lipopolysaccharide_assembly	14.07	13.04	0.08	87.33
Bacilysin_biosynthesis	1	0	0.08	87.41
A_Hypothetical_Protein_Related_to_Proline_Metabolism	1	0	0.08	87.49
Pyruvate:ferredoxin_oxidoreductase	0	1	0.08	87.57
Unknown_sugar_utilization_(cluster_ydeVWYZ)	1	0	0.08	87.65
Unknown_sugar_utilization_(cluster_yphABCDEFG)	1	0	0.08	87.73
Alpha-Amylase_locus_in_Streptocococcus	0	1	0.08	87.8
D-allose_utilization	0	1	0.08	87.88
Isobutyryl-CoA_to_Propionyl-CoA_Module	0	1	0.08	87.96
Malonate_decarboxylase	0	1	0.08	88.04
Tricarballylate_Utilization	1	0	0.08	88.12
Lipid_A_modifications	3	4	0.08	88.2
Anthrose_Biosynthesis	0	1	0.08	88.28
CBSS-262719.3.peg.410	1	0	0.08	88.36
CBSS-222523.1.peg.1311	0	1	0.08	88.43
CBSS-221109.1.peg.2233	2	3	0.08	88.51
Pterin_metabolism	0	1	0.08	88.59
p-Aminobenzoyl-Glutamate_Utilization	0	1	0.08	88.67
NAD_consumption	1	0	0.08	88.75
DNA_repair_and_recombination_eukaryotic	1	0	0.08	88.83
Plasmid_replication	0	1	0.08	88.91
Gram_Positive_Competence	1	0	0.08	88.99
ABC_transporter_L-proline_glycine_betaine_(TC_3.A.1.12.1)	0	1	0.08	89.06
N-heterocyclic_aromatic_compound_degradation	0	1	0.08	89.14
Acetophenone_carboxylase	0	1	0.08	89.22
carbazol_degradation_cluster	0	1	0.08	89.3
Bacterial_light-harvesting_proteins	1	0	0.08	89.38
tRNA_aminoacylation,_mitochondrial	1	0	0.08	89.46
HtrA_and_Sec_secretion	0	1	0.08	89.54
tRNA_splicing	1	0	0.08	89.62
Rrf2_family_transcriptional_regulators	1	0	0.08	89.69
CytR_regulation	2	3	0.08	89.77
V-Type_ATP_synthase	0	1	0.08	89.85
NiFe_hydrogenase_maturation	2	1	0.08	89.93
Archaeal_membrane_bound_hydrogenases	1	0	0.08	90.01
Suberine_biosynthesis	0	1	0.08	90.09
Auxin_biosynthesis	1	2	0.08	90.17
Betaine_biosynthesis_from_glycine	1	0	0.08	90.25
Regulation_of_Oxidative_Stress_Response	0	1	0.08	90.32
CR_clusters_Euk_4	0	1	0.08	90.4
Adhesins_in_Staphylococcus	1	0	0.08	90.48
Streptococcus_pyogenes_recombinatorial_zone	1	0	0.08	90.56
Streptococcus_pyogenes_virulence_regulators	1	0	0.08	90.64
Multidrug_Resistance,_2-protein_version_Found_in_Gram-positive_bacteria	0	1	0.08	90.72
Multidrug_Resistance,_Tripartite_Systems_Found_in_Gram_Negative_Bacteria	0	1	0.08	90.8
Streptococcus_pneumoniae_Vancomycin_Tolerance_Locus	0	1	0.08	90.88
USS-DB-2	1	0	0.08	90.95
USS-DB-5	0	1	0.08	91.03
Restriction-Modification_System	10.54	11.53	0.08	91.11
Serine_Biosynthesis	19.29	20.25	0.08	91.19
Flavodoxin	2.65	3.61	0.08	91.26
Phosphoenolpyruvate_phosphomutase	3.61	2.65	0.08	91.34
Aromatic_amino_acid_interconversions_with_aryl_acids	5.2	4.24	0.08	91.41
Terminal_cytochrome_oxidases	4.8	5.74	0.07	91.49
Biogenesis_of_cytochrome_c_oxidases	17.09	16.16	0.07	91.56
Glycine_cleavage_system	25.81	24.88	0.07	91.63
Toxin-antitoxin_systems_(other_than_RelBE_and_MazEF)	2.24	3.16	0.07	91.71
Putative_sugar_ABC_transporter_(ytf_cluster)	3.32	4.24	0.07	91.78
SA:14-24	4.24	3.32	0.07	91.85
CO_Dehydrogenase	4.8	3.87	0.07	91.93
Central_meta-cleavage_pathway_of_aromatic_compound_degradation	10.77	9.85	0.07	92
CBSS-316057.3.peg.3521	10.3	9.38	0.07	92.07
CBSS-342610.3.peg.283	2.65	1.73	0.07	92.14
Transport_of_Molybdenum	3.74	2.83	0.07	92.21
Glycerolipid_and_Glycerophospholipid_Metabolism_in_Bacteria	24.12	25.02	0.07	92.29
Carbon_Starvation	5.48	4.58	0.07	92.36
Bacterial_RNA-metabolizing_Zn-dependent_hydrolases	17.78	16.88	0.07	92.43
cAMP_signaling_in_bacteria	21.26	20.37	0.07	92.5
Glutamine,_Glutamate,_Aspartate_and_Asparagine_Biosynthesis	13.49	12.61	0.07	92.57
CBSS-176279.3.peg.298	13.23	14.11	0.07	92.63
Gentisare_degradation	5.29	6.16	0.07	92.7
N-linked_Glycosylation_in_Bacteria	10.58	11.45	0.07	92.77
Capsular_heptose_biosynthesis	8.6	7.75	0.07	92.84
Experimental-PTPS	6	6.86	0.07	92.91
PQQ-dependent_quinoprotein_dehydrogenases	9.33	8.49	0.07	92.97
Cluster_Ytf_and_putative_sugar_transporter	6.78	7.62	0.07	93.04
Glutathione_Redox_Metabolism	16.64	15.81	0.07	93.1
MLST	5	5.83	0.07	93.17
Methanopterin_biosynthesis2	2.83	2	0.07	93.23
Denitrification	2	2.83	0.07	93.3
Bacterial_Endolysins:_autolysins,_phage,_and_phage-like_lysins	2.83	2	0.07	93.36
Peptidyl-prolyl_cis-trans_isomerase	12.88	13.71	0.07	93.43
Lacto-N-Biose_I_and_Galacto-N-Biose_Metabolic_Pathway	2.24	1.41	0.06	93.49
Hypothetical_Related_to_Dihydroorotate_dehydrogenase	2.24	1.41	0.06	93.56
Cluster-based_Subsystem_Grouping_Hypotheticals_-_perhaps_Proteosome_Related	2.24	1.41	0.06	93.62
Pterin_biosynthesis	1.41	2.24	0.06	93.69
Chlorophyll_Degradation	1.41	2.24	0.06	93.75
Mannose-sensitive_hemagglutinin_type_4_pilus	1.41	2.24	0.06	93.82
CBSS-176279.3.peg.868	12.85	13.64	0.06	93.88
CBSS-221988.1.peg.2137	12.53	11.75	0.06	93.94
Photosystem_II-type_photosynthetic_reaction_center	3.61	2.83	0.06	94
Acetone_Butanol_Ethanol_Synthesis	2.83	3.61	0.06	94.06
TCA_Cycle	24.06	24.84	0.06	94.13
CBSS-265072.7.peg.546	7.48	6.71	0.06	94.19
Deoxyribose_and_Deoxynucleoside_Catabolism	14.49	15.26	0.06	94.25
CBSS-261594.1.peg.788	12.69	13.45	0.06	94.31
Rhamnose_containing_glycans	14.66	15.43	0.06	94.37
Pyrroloquinoline_Quinone_biosynthesis	8.94	9.7	0.06	94.43
HMG_CoA_Synthesis	9.06	8.31	0.06	94.49
CBSS-176299.4.peg.1292	23.11	23.85	0.06	94.55
Quinate_degradation	3	3.74	0.06	94.6
Lysine_biosynthesis_AAA_pathway_2	1	1.73	0.06	94.66
CBSS-393133.3.peg.2787	1.73	1	0.06	94.72
Control_of_Swarming_in_Vibrio_and_Shewanella_species	1	1.73	0.06	94.78
Xanthosine_utilization_(xap_region)	1	1.73	0.06	94.83
Protein_secretion_by_ABC-type_exporters	1	1.73	0.06	94.89
RNA_polymerase_archaeal	1	1.73	0.06	94.95
Curli_production	1.73	1	0.06	95.01
Siderophore_Yersiniabactin_Biosynthesis	1	1.73	0.06	95.06
Listeria_phi-A118-like_prophages	1	1.73	0.06	95.12
VieSAB_signal_transduction_system_of_Vibrio	1	1.73	0.06	95.18
D-galactarate,_D-glucarate_and_D-glycerate_catabolism	2.45	1.73	0.06	95.24
Bacitracin_Stress_Response	1.73	2.45	0.06	95.29
Type_VI_secretion_systems	2.45	1.73	0.06	95.35
Allantoin_degradation	17.09	16.37	0.06	95.41
A_Gram-positive_cluster_that_relates_ribosomal_protein_L28P_to_a_set_of_uncharacterized_proteins	3.16	2.45	0.06	95.46
Mebrane_bound_hydrogenases	2.45	3.16	0.06	95.52
Chlorophyll_Biosynthesis	8.77	9.49	0.06	95.57
CBSS-393123.3.peg.1754	3.87	4.58	0.06	95.63
Trehalose_Biosynthesis	8.89	8.19	0.06	95.69
pyrimidine_conversions	24.8	25.5	0.05	95.74
CBSS-222523.1.peg.3937	5.39	4.69	0.05	95.8
Protein_degradation	25.1	25.79	0.05	95.85
CO2_uptake,_carboxysome	11.31	12	0.05	95.9
Alkylphosphonate_utilization	8.43	9.11	0.05	95.96
EC49-61	12.17	12.85	0.05	96.01
Nitrogen_fixation	2.65	3.32	0.05	96.06
Nitrate_and_nitrite_ammonification	5.57	4.9	0.05	96.12
Choline_Transport	15.39	16.06	0.05	96.17
coenzyme_M_biosynthesis	4.12	3.46	0.05	96.22
Lipoprotein_sorting_system	13.45	12.81	0.05	96.27
Formaldehyde_assimilation:_Ribulose_monophosphate_pathway	2	2.65	0.05	96.32
Serotype_determining_Capsular_polysaccharide_biosynthesis_in_Staphylococcus	2.65	2	0.05	96.37
Phosphonate_metabolism	2	2.65	0.05	96.42
CR_clusters_Euk_1	2	2.65	0.05	96.48
Hypothetical_Coupled_to_RecF	2.83	3.46	0.05	96.53
Phenylacetate_pathway_of_aromatic_compound_degradation	17.64	17	0.05	96.58
Maltose_and_Maltodextrin_Utilization	19.26	18.63	0.05	96.63
Calvin-Benson_cycle	11.87	11.27	0.05	96.67
CBSS-281090.3.peg.464	12.12	12.73	0.05	96.72
CBSS-316407.3.peg.1371	11.36	11.96	0.05	96.77
CRISPRs	2.83	2.24	0.05	96.81
Dihydroxyacetone_kinases	5.39	4.8	0.05	96.86
N-Acetyl-Galactosamine_and_Galactosamine_Utilization	1.41	2	0.05	96.91
ATP-dependent_Nuclease	1.41	2	0.05	96.95
Fatty_Acid_Biosynthesis_FASI	1.41	2	0.05	97
rRNA_modification_Haloferax	1.41	2	0.05	97.05
NAD_and_NADP_cofactor_biosynthesis_global	25.16	24.58	0.05	97.09
TrmE_experimental	22.09	22.67	0.05	97.14
Pyruvate_Alanine_Serine_Interconversions	14.59	15.17	0.04	97.18
SigmaB_stress_responce_regulation	7.42	6.86	0.04	97.23
CBSS-269801.1.peg.1725	2.45	3	0.04	97.27
CBSS-196164.1.peg.1690	25	25.53	0.04	97.31
CBSS-176280.1.peg.1561	3.61	4.12	0.04	97.35
Superpathway_of_cysteine_biosynthesis	5.57	6.08	0.04	97.39
YcfH	8.6	9.11	0.04	97.43
Serine-glyoxylate_cycle	44.67	44.16	0.04	97.47
Phenazine_biosynthesis	2.24	1.73	0.04	97.51
Salicylate_ester_degradation	4.24	3.74	0.04	97.55
Purine_Utilization	17.29	16.79	0.04	97.59
Photorespiration_(oxidative_C2_cycle)	2.83	3.32	0.04	97.63
Isoleucine_degradation	16.12	15.65	0.04	97.67
CBSS-296591.1.peg.2330	23.13	23.6	0.04	97.7
Na+_translocating_decarboxylases_and_related_biotin-dependent_enzymes	7.75	7.28	0.04	97.74
Two-component_regulatory_systems_in_Campylobacter	3.46	3	0.04	97.78
Ammonia_assimilation	15.39	14.93	0.04	97.81
CBSS-196164.1.peg.461	10.05	9.59	0.04	97.85
Transport_of_Zinc	14.21	14.66	0.04	97.89
ABC_transporter_peptide_(TC_3.A.1.5.5)	2.45	2	0.04	97.92
Tetrathionate_respiration	2	2.45	0.04	97.96
Tolerance_to_colicin_E2	2	2.45	0.04	97.99
CBSS-176279.3.peg.1389	4.69	4.24	0.04	98.03
Glycine_reductase,_sarcosine_reductase_and_betaine_reductase	6.48	6.93	0.04	98.06
CBSS-630.2.peg.3360	16.58	17.03	0.04	98.1
CBSS-342610.3.peg.1536	7.75	8.19	0.03	98.13
Type_IV_pilus	6.63	7.07	0.03	98.17
CBSS-323850.3.peg.3269	14.83	15.26	0.03	98.2
CRnot_mitoch_clusters_Euk_1	3.74	3.32	0.03	98.23
CMP-N-acetylneuraminate_Biosynthesis	10.82	10.39	0.03	98.27
Purine_conversions	30.71	31.13	0.03	98.3
Proline_Synthesis	8.6	8.19	0.03	98.33
Citrate_Metabolism,_Transport,_and_Regulation	1.41	1	0.03	98.37
Biofilm_Adhesin_Biosynthesis	1.41	1	0.03	98.4
Pterin_carbinolamine_dehydratase	1	1.41	0.03	98.43
gram_plus_late_competence	1	1.41	0.03	98.46
Coagulation_cascade	1	1.41	0.03	98.5
Prophage-encoded_Rst_operon	1	1.41	0.03	98.53
Staphylococcal_phi-Mu50B-like_prophages	1	1.41	0.03	98.56
Benzoate_catabolism	2.65	2.24	0.03	98.59
Rhamnolipids_in_Pseudomonas	2.24	2.65	0.03	98.63
Phosphorylcholine_incorporation_in_LPS	2.83	2.45	0.03	98.66
Carbonate_Biomineralization	2.83	2.45	0.03	98.69
Perosamine_Synthesis_Vibrio	9.43	9.06	0.03	98.72
CBSS-314269.3.peg.1840	6.48	6.86	0.03	98.74
Periplasmic_Stress_Response	12.08	12.45	0.03	98.77
MexE-MexF-OprN_Multidrug_Efflux_System	3	2.65	0.03	98.8
De_Novo_Pyrimidine_Synthesis	24.84	25.18	0.03	98.83
Arsenic_resistance	6.16	5.83	0.03	98.85
CBSS-257314.1.peg.488	15.36	15.68	0.03	98.88
Arginine_Deiminase_Pathway	1.41	1.73	0.03	98.91
Luciferases	1.73	1.41	0.03	98.93
Ribosome_SSU_eukaryotic_and_archaeal	1.41	1.73	0.03	98.96
Type_4_secretion_and_conjugative_transfer	1.73	1.41	0.03	98.98
Propionyl-CoA_to_Succinyl-CoA_Module	9.64	9.95	0.02	99
Phage_shock_protein_(psp)_operon	3.16	3.46	0.02	99.03
Transcription_factors_bacterial	22.18	22.47	0.02	99.05
Selenoprotein_O	10.49	10.2	0.02	99.07
Embden-Meyerhof_and_Gluconeogenesis_Archaeal	15.84	16.12	0.02	99.1
L-fucose_utilization	3.46	3.74	0.02	99.12
Widespread_colonization_island	5.39	5.66	0.02	99.14
CBSS-269801.1.peg.2186	1.73	2	0.02	99.16
DNA_Helicase_of_Unknown_Function	2	1.73	0.02	99.18
carnitine_metabolism	1.73	2	0.02	99.2
Nucleolar_protein_complex	1.73	2	0.02	99.22
Multiple_Antibiotic_Resistance_MAR_locus	1.73	2	0.02	99.24
Streptococcus_pyogenes_Virulome	2	1.73	0.02	99.27
CBSS-335283.3.peg.454	22.93	23.19	0.02	99.29
Pterin_metabolism_3	19.39	19.65	0.02	99.31
Cysteine_Biosynthesis	16.03	16.28	0.02	99.33
CBSS-393124.3.peg.2657	4	4.24	0.02	99.35
CBSS-176299.4.peg.1996	27.04	26.8	0.02	99.36
Fe-S_cluster_assembly	8.19	8.43	0.02	99.38
Erythritol_utilization	2.24	2	0.02	99.4
Vibrio_Core_Oligosaccharide_Biosynthesis	2	2.24	0.02	99.42
CBSS-323850.3.peg.3142	2.24	2	0.02	99.44
GroEL_GroES	10.54	10.77	0.02	99.46
Proline,_4-hydroxyproline_uptake_and_utilization	23.81	23.58	0.02	99.48
RNA_polymerase_bacterial	25.75	25.98	0.02	99.49
CBSS-412883.3.peg.2513	10.91	10.68	0.02	99.51
Pyruvate_metabolism_I:_anaplerotic_reactions,_PEP	25.22	25	0.02	99.53
Coenzyme_A_Biosynthesis	25.77	25.55	0.02	99.55
Lipoic_acid_metabolism	14.11	13.89	0.02	99.56
p-Hydroxybenzoate_degradation	2.24	2.45	0.02	99.58
Beta-Glucoside_Metabolism	4.8	4.58	0.02	99.6
Sialic_Acid_Metabolism	19	19.21	0.02	99.61
Pyridoxin_(Vitamin_B6)_Biosynthesis	17.03	16.82	0.02	99.63
Transport_of_Iron	17.41	17.2	0.02	99.65
DNA_replication,_archaeal	2.65	2.45	0.02	99.66
Fatty_Acid_Biosynthesis_FASII	31.72	31.91	0.01	99.68
D-Tagatose_and_Galactitol_Utilization	2.83	2.65	0.01	99.69
Ethanolamine_utilization	2.83	2.65	0.01	99.7
Dehydrogenase_complexes	27.98	27.8	0.01	99.72
Alkanesulfonate_assimilation	8.83	8.66	0.01	99.73
L-Arabinose_utilization	8.89	9.06	0.01	99.75
Iron_acquisition_in_Vibrio	9.33	9.49	0.01	99.76
Archaeal_lipids	3.16	3.32	0.01	99.77
Sodium_Hydrogen_Antiporter	3.32	3.16	0.01	99.78
Terminal_cytochrome_C_oxidases	23.37	23.22	0.01	99.79
Hexose_Phosphate_Uptake_System	3.46	3.61	0.01	99.81
Inteins	3.46	3.61	0.01	99.82
Methanogenesis_from_methylated_compounds	3.74	3.61	0.01	99.83
CBSS-288681.3.peg.1039	3.61	3.74	0.01	99.84
Chorismate:_Intermediate_for_synthesis_of_PAPA_antibiotics,_PABA,_anthranilate,_3-hydroxyanthranilate_and_more.	18.57	18.71	0.01	99.85
CBSS-269482.1.peg.1294	11.4	11.27	0.01	99.86
Peptidoglycan_Biosynthesis	41.73	41.59	0.01	99.87
Lipid_A-Ara4N_pathway_(_Polymyxin_resistance_)	11.79	11.92	0.01	99.88
Acid_resistance_mechanisms	8.06	7.94	0.01	99.89
Biphenyl_Degradation	4	4.12	0.01	99.9
Regulatory_Intramembrane_Proteolysis_Pathways	4.47	4.58	0.01	99.91
D-tyrosyl-tRNA(Tyr)_deacylase	4.58	4.47	0.01	99.92
Na(+)_H(+)_antiporter	9.11	9	0.01	99.92
Twin-arginine_translocation_system	10.58	10.49	0.01	99.93
Unknown_oligosaccharide_utilization_Sde_1396	5.66	5.57	0.01	99.94
Acyclic_terpenes_utilization	5.66	5.57	0.01	99.95
Arginine_Biosynthesis_extended	5.83	5.74	0.01	99.95
CR_clusters_Euk_7_GlucoseP_isomerase	5.92	6	0.01	99.96
Fatty_acid_degradation_regulons	6.63	6.56	0.01	99.97
Riboflavin,_FMN_and_FAD_metabolism	13.23	13.15	0.01	99.97
Osmoregulation	6.78	6.71	0.01	99.98
Cold_shock,_CspA_family_of_proteins	7.14	7.07	0.01	99.98
tRNA_nucleotidyltransferase	7.35	7.42	0.01	99.99
Potassium_homeostasis	18.06	18	0	99.99
De_Novo_Purine_Biosynthesis	31.54	31.51	0	100
D-gluconate_and_ketogluconates_metabolism	15.94	15.91	0	100
Iron-sulfur_cluster_assembly	18.22	18.25	0	100
Cyanophycin_metabolism	2.45	2.45	0	100
Phenylalanine_synthesis	0	0	0	100
Leucine_Biosynthesis	0	0	0	100
Threonine_anaerobic_catabolism_gene_cluster	0	0	0	100
(GlcNAc)2_Catabolic_Operon	0	0	0	100
Carboxysome	0	0	0	100
Sucrose_utilization	1	1	0	100
L-ascorbate_utilization_(and_related_gene_clusters)	0	0	0	100
Alpha-acetolactate_operon	0	0	0	100
Propanediol_utilization	0	0	0	100
Autoinducer_2_(AI-2)_transport_and_processing_(lsrACDBFGE_operon)	1.41	1.41	0	100
beta-glucuronide_utilization	0	0	0	100
MukBEF_Chromosome_Condensation	0	0	0	100
Sporulation_Cluster_III_A	0	0	0	100
Capsular_Polysaccharide_Biosynthesis_in_Vibrio	0	0	0	100
Xanthan_Exopolysaccharide_Biosynthesis_and_Export	0	0	0	100
linker_unit-arabinogalactan_synthesis	0	0	0	100
D-Alanyl_Lipoteichoic_Acid_Biosynthesis	0	0	0	100
Spore_Coat	0	0	0	100
Teichoic_and_lipoteichoic_acids_biosynthesis	11.66	11.66	0	100
CBSS-393130.3.peg.794	2.83	2.83	0	100
Sporulation-related_Hypotheticals	1.73	1.73	0	100
A_Glutathione-dependent_Thiol_Reductase_Assoiated_with_a_Step_in_Lysine_Biosynthesis	2.24	2.24	0	100
CBSS-84588.1.peg.1247	0	0	0	100
CBSS-243265.1.peg.4415	2.24	2.24	0	100
CBSS-257314.1.peg.676	0	0	0	100
CBSS-243265.1.peg.3592	0	0	0	100
CBSS-159087.4.peg.2189	0	0	0	100
CBSS-214092.1.peg.3450	0	0	0	100
CBSS-370552.3.peg.1240	0	0	0	100
CBSS-393131.3.peg.612	0	0	0	100
LMPTP_YwlE_cluster	0	0	0	100
NusA-TFII_Cluster	0	0	0	100
Coenzyme_B_synthesis	0	0	0	100
Coenzyme_F420_synthesis	0	0	0	100
Pyridoxin(Vitamin_B6)_Degradation_Pathway	0	0	0	100
Ubiquinone_Biosynthesis	0	0	0	100
Heme_biosynthesis_orphans	1	1	0	100
Rad50-Mre11::SbcD-SbcC_DNA_Repair_Module	0	0	0	100
DNA_topoisomerases,_Type_I,_ATP-independent	1.41	1.41	0	100
Conjugative_transposon,_Bacteroidales	0	0	0	100
Small_acid-soluble_spore_proteins	0	0	0	100
Sphingolipid_biosynthesis	0	0	0	100
Glycerol_fermenation_to_1,3-propanediol	0	0	0	100
ABC_transporter_molybdenum_(TC_3.A.1.8.1)	0	0	0	100
ABC_transporter_nickel_(TC_3.A.1.5.3)	0	0	0	100
ABC_transporter_of_unknown_substrate_X	0	0	0	100
Fructose_and_Mannose_Inducible_PTS	1.41	1.41	0	100
Sucrose-specific_PTS	0	0	0	100
Cryptic_ferrous_iron_transporter_EfeUOB	0	0	0	100
Hydroxyaromatic_decarboxylase_family	0	0	0	100
Catechol_branch_of_beta-ketoadipate_pathway	15.03	15.03	0	100
p-cymene_degradation	0	0	0	100
Archease	0	0	0	100
Archaeal_Flagellum	0	0	0	100
Dissimilatory_nitrite_reductase	0	0	0	100
Nucleoside_triphosphate_pyrophosphohydrolase_MazG	0	0	0	100
Purine_nucleotide_synthesis_regulator	0	0	0	100
P_uptake_(cyanobacteria)	0	0	0	100
Programmed_frameshift	0	0	0	100
Ribosome_LSU_eukaryotic_and_archaeal	2.45	2.45	0	100
Translation_initiation_factors_eukaryotic_and_archaeal	2	2	0	100
Proteasome_archaeal	0	0	0	100
Proteolysis_in_bacteria,_ATP-dependent	5.83	5.83	0	100
Thermosome,_archaeal	1	1	0	100
Protein_Acetylation_and_Deacetylation_in_Bacteria	0	0	0	100
Signal_peptidase	0	0	0	100
RNA_3&#39;-terminal_phosphate_cyclase	0	0	0	100
Ribonuclease_P_archaeal_and_eukaryal	0	0	0	100
RNA_polymerase_I	0	0	0	100
RNA_polymerase_archaeal_initiation_factors	0	0	0	100
Bacteriocin-like_peptides_Blp	0	0	0	100
Biofilm_formation_in_Staphylococcus	0	0	0	100
P38_MAP_kinase_pathways	0	0	0	100
MazEF_toxin-antitoxing_(programmed_cell_death)_system	0	0	0	100
RelBE_bacterial_toxin-antitoxin_system	0	0	0	100
Energy-conserving_hydrogenase_(ferredoxin)	0	0	0	100
Formate_dehydrogenase	0	0	0	100
H2:CoM-S-S-HTP_oxidoreductase	0	0	0	100
Carbon_monoxide_dehydrogenase_maturation_factors	0	0	0	100
Reductive_Dechlorination	0	0	0	100
pH_adaptation_potassium_efflux_system	1	1	0	100
Cinnamic_Acid_Degradation	0	0	0	100
Clavulanic_acid_biosynthesis	0	0	0	100
Steroid_sulfates	1	1	0	100
Anthocyanin_biosynthesis	0	0	0	100
Biflavanoid_biosynthesis	0	0	0	100
Lignine_biosynthesis	0	0	0	100
Phytosterol_biosynthesis	0	0	0	100
Tannin_biosynthesis	0	0	0	100
Octadecanoids	0	0	0	100
Terpen_biosynthesis	0	0	0	100
Periplasmic_Acid_Stress_Response_in_Enterobacteria	0	0	0	100
Rubrerythrin	3.16	3.16	0	100
Bacterial_hemoglobins	1	1	0	100
Tolerance_to_Furfural-Induced_Stress	1	1	0	100
CBSS-87626.3.peg.3639	0	0	0	100
CR_clusters_Euk_2	0	0	0	100
CR_clusters_Euk_3	0	0	0	100
Cytolysin_and_Lipase_operon_in_Vibrio	0	0	0	100
pVir_Plasmid_of_Campylobacter	0	0	0	100
Salmochelin-mediated_Iron_Acquisition	0	0	0	100
Siderophore_biosynthesis_in_Staphylococci	0	0	0	100
Siderophore_pyochelin	0	0	0	100
Vibrioferrin_synthesis	0	0	0	100
Listeria_Pathogenicity_Island_LIPI-1_extended	0	0	0	100
IbrA_and_IbrB:_co-activators_of_prophage_gene_expression	0	0	0	100
MT1-MMP_Pericellular_Network	0	0	0	100
Quorum-sensing_in_Vibrio	0	0	0	100
Quorum_sensing_regulation_in_Pseudomonas	0	0	0	100
Streptococcal_Mga_Regulon	0	0	0	100
Aminoglycoside_adenylyltransferases	0	0	0	100
Mercury_resistance_operon	0	0	0	100
Multidrug_efflux_pump_in_Campylobacter_jejuni_(CmeABC_operon)	0	0	0	100
Streptothricin_resistance	0	0	0	100
The_mdtABCD_multidrug_resistance_cluster	1	1	0	100
USS-DB-1	0	0	0	100
USS-DB-4	0	0	0	100
Streptolysin_S_Biosynthesis_and_Transport	1	1	0	100
ESAT-6_proteins_secretion_system_in_Actinobacteria	0	0	0	100
ESAT-6_proteins_secretion_system_in_Firmicutes	0	0	0	100
Toxin_co-regulated_pilus	0	0	0	100
Type_III_secretion_system	0	0	0	100
Type_1_pili_(mannose-sensitive_fimbriae)	0	0	0	100
