# Supplementary material for: The Taxonomic and Functional Diversity of Microbes at a Temperate Coastal Site: A ‘Multi-Omic’ Study of Seasonal and Diel Temporal Variation
Source: PLoS One. 2010 Nov 29;5(11):e15545. doi: 10.1371/journal.pone.0015545 (PMC2993967; doi:10.1371/journal.pone.0015545)
Supplement: Table S7 — SIMPER analysis of the contribution of different functional genes to dissimilarities between day and night samples in August for the metagenomic samples annotated against the Hierarchy 1 SEED subsystem database. All data were randomly re-sampled prior to analysis and the abundances were transformed by square root. Av.Abund – square root of average abundance; Contrib% - individual % contribution of that metabolic function to the dissimilarities between samples; Cum.% - Cumulative % contribution of metabolic functions to dissimilarities between samples. (XLSX) [file pone.0015545.s011.xlsx]

## Sheet: Sheet1
Functional category	August Day Av.Abund.	August Night Av.Abund.	Contrib%	Cum.%
CBSS-188.1.peg.6170	23.13	13.61	0.83	0.83
Choline_and_Betaine_Uptake_and_Betaine_Biosynthesis	27.63	18.9	0.76	1.59
CBSS-345072.3.peg.1318	14.19	22.67	0.74	2.33
ABC_transporter_branched-chain_amino_acid_(TC_3.A.1.4.1)	24.35	15.94	0.73	3.07
Glycine_and_Serine_Utilization	12.94	21.26	0.73	3.79
CBSS-269799.3.peg.2220	12.68	20.62	0.69	4.48
Glycolate,_glyoxylate_interconversions	21.96	14.49	0.65	5.13
CBSS-258594.1.peg.3339	23.84	31.22	0.64	5.78
Respiratory_Complex_I	32.56	25.23	0.64	6.42
Cobalt-zinc-cadmium_resistance	22.24	29.42	0.63	7.04
Bacterial_motility:Gliding	16.85	23.89	0.61	7.66
DNA_Repair_Base_Excision	25.88	19.19	0.58	8.24
CBSS-49338.1.peg.459	22.98	16.88	0.53	8.77
Polyamine_Metabolism	19.94	13.93	0.52	9.3
Glycerol_and_Glycerol-3-phosphate_Uptake_and_Utilization	20.48	14.71	0.5	9.8
Menaquinone_and_Phylloquinone_Biosynthesis	17.2	22.67	0.48	10.28
CBSS-218491.3.peg.427	20.94	26.39	0.47	10.75
Methylcitrate_cycle	11.21	5.96	0.46	11.21
Glutaredoxins	25.42	20.21	0.45	11.66
Homogentisate_pathway_of_aromatic_compound_degradation	9.49	14.54	0.44	12.1
Propionate-CoA_to_Succinate_Module	17.39	12.35	0.44	12.54
Cellulosome	9.68	14.7	0.44	12.98
Ton_and_Tol_transport_systems	41.13	46	0.42	13.41
Ubiquinone_Menaquinone-cytochrome_c_reductase_complexes	16.54	11.72	0.42	13.83
Asp-tRNA(Asn)_transamidation	25.45	20.68	0.42	14.24
Photosystem_II	4.47	9.06	0.4	14.64
CBSS-266117.6.peg.2476	14.41	9.84	0.4	15.04
CBSS-198094.1.peg.4426	5.93	10.48	0.4	15.44
Chitin_and_N-acetylglucosamine_utilization	10	14.46	0.39	15.83
Transport_of_Manganese	9.83	14.25	0.38	16.21
Histidine_Degradation	14.6	18.93	0.38	16.59
DNA_repair,_bacterial_RecFOR_pathway	16.19	20.52	0.38	16.97
CBSS-316273.3.peg.227	14.86	10.58	0.37	17.34
Conenzyme_B12_related_Hypothetical:_Clusters_with_cobST	11.53	7.3	0.37	17.71
Na(+)-translocating_NADH-quinone_oxidoreductase_and_rnf-like_group_of_electron_transport_complexes	17.57	21.75	0.36	18.07
Methionine_Salvage	9.22	5.12	0.36	18.43
NAD_regulation	6.25	10.34	0.36	18.79
CBSS-323850.3.peg.3284	12.65	16.71	0.35	19.14
Allantoin_degradation	19.54	15.5	0.35	19.49
Arginine_Biosynthesis	28.95	24.93	0.35	19.84
Inositol_catabolism	14.97	10.99	0.35	20.19
Type_I_Restriction-Modification	3.38	7.36	0.35	20.54
Mannose_Metabolism	14.63	18.59	0.34	20.88
CBSS-205922.3.peg.1809	10.4	6.56	0.34	21.22
Alginate_metabolism	8.66	12.46	0.33	21.55
Folate_Biosynthesis	30.5	34.29	0.33	21.88
Carotenoids	23.42	27.16	0.33	22.2
Multidrug_Resistance_Efflux_Pumps	17.66	21.38	0.32	22.53
Methionine_Biosynthesis	34.12	30.4	0.32	22.85
Butanol_Biosynthesis	28.82	32.49	0.32	23.17
ABC_transporter_dipeptide_(TC_3.A.1.5.2)	12.52	16.15	0.32	23.49
CBSS-323098.3.peg.2823	10.91	14.49	0.31	23.8
Urea_decomposition	11.38	7.83	0.31	24.11
Taurine_Utilization	8.01	4.47	0.31	24.42
Hydantoin_metabolism	17.09	13.56	0.31	24.73
Galactosylceramide_and_Sulfatide_metabolism	13.86	17.36	0.31	25.03
Pyruvate_metabolism_II:_acetyl-CoA,_acetogenesis_from_pyruvate	33.75	30.24	0.31	25.34
DMSP_breakdown	12.16	8.66	0.31	25.64
Coenzyme_B12_biosynthesis	16.83	13.36	0.3	25.95
Branched_chain_amino_acid_degradation_regulons	17.88	14.44	0.3	26.25
YgfZ-Fe-S	13.46	10.02	0.3	26.55
Entner-Doudoroff_Pathway	24.99	28.3	0.29	26.84
Heat_shock_dnaK_gene_cluster_extended	17.54	20.82	0.29	27.12
Two_cell_division_clusters_relating_to_chromosome_partitioning	16.33	13.05	0.29	27.41
YgfZ-Fe-S_clustering	13.33	10.06	0.29	27.69
Experimental_-Creatinine_degradation	11.81	8.58	0.28	27.97
Pyrimidine_utilization	11.63	8.42	0.28	28.25
CBSS-314225.3.peg.515	8.34	5.14	0.28	28.53
Glutathione-regulated_potassium-efflux_system_and_associated_functions	25.74	28.94	0.28	28.81
tRNA_processing	23.46	26.62	0.28	29.09
O-Methyl_Phosphoramidate_Capsule_Modification_in_Campylobacter	8.66	5.5	0.28	29.36
D-ribose_utilization	15.88	12.74	0.27	29.64
Salicylate_and_gentisate_catabolism	10.31	7.18	0.27	29.91
CBSS-316279.3.peg.746	9.4	12.51	0.27	30.18
Molybdopterin_biosynthesis	14.11	11.01	0.27	30.45
Valine_degradation	11.98	15.03	0.27	30.72
GroEL_GroES	12.74	9.67	0.27	30.99
Outer_membrane	11.02	14.05	0.26	31.25
Siderophore_enterobactin_biosynthesis_and_ferric_enterbactin_transport	5.74	8.74	0.26	31.51
Beta-lactamase	15.9	18.89	0.26	31.77
PmbA_and_a_Hypothetical_Protein	12.64	9.66	0.26	32.03
Sulfatases_and_sulfatase_modifying_factor_1	10.86	13.84	0.26	32.29
Iron-sulfur_experimental	36.32	33.35	0.26	32.55
dTDP-rhamnose_synthesis	16.83	19.78	0.26	32.81
Alanine_biosynthesis	12.79	9.88	0.25	33.06
Fe-S_cluster_assembly	7.7	10.6	0.25	33.31
Dimethylarginine_metabolism	7.28	10.15	0.25	33.57
Calvin-Benson_cycle	12.62	9.85	0.24	33.81
Histidine_Biosynthesis	32.47	29.71	0.24	34.05
Fermentations:_Lactate	14.75	11.99	0.24	34.29
CBSS-314267.3.peg.390	8.93	11.62	0.23	34.52
Cytochrome_B6-F_complex	2.29	3.69	0.23	34.76
Hfl_operon	12.21	9.53	0.23	34.99
CBSS-316057.3.peg.1308	20.39	23.08	0.23	35.23
Experimental-Ubiquinone_BiosynthesisVDC	26.06	23.42	0.23	35.46
Core_Oligosaccharide_Glycosylation_in_Pseudomonas	5.64	3	0.23	35.69
DNA_repair,_bacterial	36.82	39.46	0.23	35.92
Deoxyribose_and_Deoxynucleoside_Catabolism	13.34	15.97	0.23	36.15
CBSS-316057.3.peg.659	8.53	11.14	0.23	36.37
CBSS-221988.1.peg.771	8.21	10.78	0.22	36.6
Phycobilisome	2.5	2.85	0.22	36.82
Sulfur_oxidation	11.85	9.35	0.22	37.03
Arginine_and_Ornithine_Degradation	11.11	8.62	0.22	37.25
CBSS-393121.3.peg.1913	12.81	15.29	0.22	37.47
Dihydroxyacetone_kinases	7.11	4.63	0.22	37.69
Sialic_Acid_Metabolism	17.71	20.17	0.22	37.9
Mannose-sensitive_hemagglutinin_type_4_pilus	4.69	4.7	0.21	38.11
ABC_transporter_glutamine_(TC_3.A.1.3.2)	8.24	5.83	0.21	38.33
Soluble_cytochromes_and_functionally_related_electron_carriers	10.51	12.92	0.21	38.54
CBSS-412883.3.peg.2513	11.49	9.1	0.21	38.74
CBSS-89187.3.peg.2957	8.92	6.56	0.21	38.95
Toxin-antitoxin_systems_(other_than_RelBE_and_MazEF)	2	2.35	0.2	39.15
CBSS-176299.3.peg.235	3.95	1.82	0.2	39.36
Universal_GTPases	35.86	38.18	0.2	39.56
Translation_factors_bacterial	18.7	21.01	0.2	39.76
Acetyl-CoA_fermentation_to_Butyrate	22.03	19.71	0.2	39.96
CBSS-281090.3.peg.464	10.41	12.69	0.2	40.16
ECF_class_transporters	7.24	4.98	0.2	40.36
Bacterial_RNA-metabolizing_Zn-dependent_hydrolases	17.99	16.11	0.19	40.55
Choline_Transport	10.95	13.18	0.19	40.75
5-FCL-like_protein	16.4	14.18	0.19	40.94
Type_4_secretion_and_conjugative_transfer	6.54	4.32	0.19	41.14
Acetoin,_butanediol_metabolism	12.7	10.49	0.19	41.33
ATP-dependent_RNA_helicases,_bacterial	17.16	19.36	0.19	41.52
Benzoate_degradation	8.28	6.08	0.19	41.71
Aminotransferases:Aromatic_Pathway_and_More,_A_work_in_progress	7.04	4.84	0.19	41.9
Hydrogenases	7.03	4.85	0.19	42.09
D-tyrosyl-tRNA(Tyr)_deacylase	4.05	6.23	0.19	42.28
Sucrose_Metabolism	24.46	26.63	0.19	42.47
GJO_regulatory_system_scratch	5.56	3.87	0.19	42.66
tRNA_modification_Archaea_Henri	12.67	14.83	0.19	42.85
CBSS-176280.1.peg.1561	3.37	5.52	0.19	43.04
Threonine_and_Homoserine_Biosynthesis	25.71	23.57	0.19	43.23
Lactate_utilization	12.55	10.42	0.19	43.41
CBSS-281309.1.peg.50	27.8	29.94	0.19	43.6
Hypothetical_Related_to_Dihydroorotate_dehydrogenase	4.24	2.12	0.18	43.78
Glu-tRNA(Gln)_transamidation	5.57	3.46	0.18	43.97
2-methylcitrate_to_2-methylaconitate_metabolism_cluster	4.18	2.09	0.18	44.15
YjeE	11.49	9.41	0.18	44.33
Purine_conversions	29.72	31.79	0.18	44.51
Peptidoglycan_Biosynthesis	41.15	43.23	0.18	44.69
RNA_polymerase_II	5.12	6.1	0.18	44.87
Type_IV_pilus	11.28	9.5	0.18	45.05
Cyanobacterial_Circadian_Clock	7.8	7.74	0.18	45.23
Branched-Chain_Amino_Acid_Biosynthesis	34.75	32.69	0.18	45.41
Listeria_surface_proteins:_Internalin-like_proteins	4.44	6.48	0.18	45.59
Bacterial_Chemotaxis	14.07	14.79	0.18	45.77
Sugar_catabolome_in_Shewanella_species	13.4	14.59	0.18	45.94
Thiamin_biosynthesis	18.43	16.41	0.18	46.12
Fermentations:_Mixed_acid	7.15	5.14	0.18	46.3
Common_Pathway_For_Synthesis_of_Aromatic_Compounds_(DAHP_synthase_to_chorismate)	26.07	24.27	0.18	46.47
Isoprenoid_Biosynthesis	28.24	26.22	0.18	46.65
Group_II_intron-associated_genes	8.75	10.76	0.18	46.82
Glycogen_metabolism	4.23	6.24	0.18	47
Proteolysis_in_bacteria,_ATP-dependent	5.87	3.86	0.18	47.17
Chorismate_Synthesis	12.29	10.28	0.17	47.35
Bacterial_Cell_Division	21.27	22.79	0.17	47.52
CBSS-342610.3.peg.1794	11.18	13.17	0.17	47.7
Stringent_Response,_(p)ppGpp_metabolism	6.19	8.18	0.17	47.87
CBSS-323850.3.peg.3142	3.4	3.52	0.17	48.04
Restriction-Modification_System	10.57	12.55	0.17	48.22
Biphenyl_Degradation	6.91	4.95	0.17	48.39
Pseudaminic_Acid_Biosynthesis	4.88	2.92	0.17	48.56
Anaerobic_benzoate_metabolism	8.77	10.74	0.17	48.73
mycolic_acid_synthesis	4.94	2.98	0.17	48.9
Utilization_of_glutathione_as_a_sulphur_source	11.27	9.33	0.17	49.07
Biolumenescence	5.02	3.08	0.17	49.24
Ribosome_biogenesis_bacterial	21.86	23.8	0.17	49.41
Beta-Glucoside_Metabolism	3.59	5.52	0.17	49.58
Chlorophyll_Biosynthesis	12.97	11.05	0.17	49.74
Threonine_degradation	12.52	14.43	0.17	49.91
Neotrehalosadiamine_(NTD)_Biosynthesis_Operon	2.41	0.5	0.17	50.08
trimethylamine_N-oxide_(TMAO)_reductase	4.5	2.6	0.17	50.24
Phenylpropionate_Degradation	2.9	1	0.17	50.41
L-fucose_utilization	4.35	2.45	0.17	50.57
CBSS-316057.3.peg.563	7.1	5.21	0.17	50.74
Formate_hydrogenase	16.63	15.13	0.16	50.9
Nitrate_and_nitrite_ammonification	8.21	6.63	0.16	51.07
CBSS-261594.1.peg.788	13.64	15.51	0.16	51.23
Listeria_Pathogenicity_Island_LIPI-1_extended	1.41	3.29	0.16	51.39
CBSS-243277.1.peg.511	12.65	10.99	0.16	51.56
CBSS-176299.4.peg.1996	25.78	27.64	0.16	51.72
Zinc_regulated_enzymes	9.43	11.29	0.16	51.88
F0F1-type_ATP_synthase	27.06	27.39	0.16	52.04
DNA_replication,_archaeal	3.05	4.08	0.16	52.2
CBSS-269801.1.peg.1725	2.88	4.72	0.16	52.37
Salicylate_ester_degradation	3.19	1.37	0.16	52.52
CBSS-83331.1.peg.3039	23.18	25	0.16	52.68
Nitrogen_fixation	1	2.82	0.16	52.84
Type_1_pili_(mannose-sensitive_fimbriae)	3.21	3.21	0.16	53
CBSS-261591.3.peg.3916	18.32	16.54	0.16	53.15
Glutamine_synthetases	10.1	8.32	0.16	53.31
KDO2-Lipid_A_biosynthesis	30.83	32.6	0.16	53.47
Two-component_sensor_regulator_linked_to_Carbon_Starvation_Protein_A	2.34	4.12	0.16	53.62
Protein_degradation	22.29	24.05	0.15	53.77
Aromatic_Amin_Catabolism	10.78	12.53	0.15	53.92
Synthesis_of_osmoregulated_periplasmic_glucans	3.11	3.86	0.15	54.08
Streptococcus_pyogenes_Virulome	1.57	3.31	0.15	54.23
Acetophenone_carboxylase	0.5	2.24	0.15	54.38
Alkaloid_biosynthesis_from_L-lysine	6.84	5.11	0.15	54.53
Isoleucine_degradation	13.44	15.16	0.15	54.68
CBSS-326442.4.peg.1852	16.01	14.28	0.15	54.83
DNA_topoisomerases,_Type_I,_ATP-independent	1.21	2.94	0.15	54.98
Translation_initiation_factors_eukaryotic_and_archaeal	2.28	4	0.15	55.13
4-Hydroxyphenylacetic_acid_catabolic_pathway	3.67	5.38	0.15	55.28
YgjD_and_YeaZ	6.53	8.24	0.15	55.43
CBSS-393130.3.peg.794	2.53	4.24	0.15	55.58
CBSS-314269.3.peg.1840	8.49	7.1	0.15	55.73
Riboflavin,_FMN_and_FAD_metabolism	13.26	14.97	0.15	55.88
Arsenic_resistance	4.74	6.43	0.15	56.03
Lipoprotein_sorting_system	12.62	11	0.15	56.17
Staphylococcal_pathogenicity_islands_SaPI	9.65	11.34	0.15	56.32
Biotin_biosynthesis	14.7	13.15	0.15	56.46
Queuosine-Archaeosine_Biosynthesis	25.16	23.48	0.15	56.61
Maltose_and_Maltodextrin_Utilization	18	19.66	0.15	56.76
Lactose_utilization	2.53	0.87	0.14	56.9
Transcription_factors_cyanobacterial_RpoD-like_sigma_factors	1.58	2.16	0.14	57.05
CBSS-176279.3.peg.298	13.38	15.03	0.14	57.19
CBSS-316057.3.peg.3521	9.35	8.79	0.14	57.33
CBSS-196164.1.peg.1690	26.24	24.59	0.14	57.48
Sucrose_utilization_Shewanella	4.1	4.4	0.14	57.62
Respiratory_dehydrogenases_1	22.48	20.91	0.14	57.77
Vibrio_Core_Oligosaccharide_Biosynthesis	1.62	3.24	0.14	57.91
USS-DB-7	4.93	4.78	0.14	58.05
Ribosome_LSU_mitochondrial	1.62	0	0.14	58.19
RNA_polymerase_chloroplast	0.5	2.12	0.14	58.33
Photorespiration_(oxidative_C2_cycle)	3.78	2.3	0.14	58.47
Ribosome_LSU_bacterial	32.62	31.92	0.14	58.61
Glycerate_metabolism	16.94	15.73	0.14	58.75
CBSS-83332.1.peg.3803	32.88	31.74	0.14	58.89
CBSS-56780.10.peg.1536	15.97	17.58	0.14	59.03
Trehalose_Uptake_and_Utilization	5.48	6.24	0.14	59.17
Cluster-based_Subsystem_Grouping_Hypotheticals_-_perhaps_Proteosome_Related	3.6	2.64	0.14	59.31
Xanthosine_utilization_(xap_region)	0.5	2.09	0.14	59.45
Bilin_Biosynthesis	2.9	1.58	0.14	59.59
Heme_and_Siroheme_Biosynthesis	32.13	31.55	0.14	59.73
Arginine_Deiminase_Pathway	2.08	0.71	0.14	59.87
pVir_Plasmid_of_Campylobacter	2.08	0.87	0.14	60
Plasmid_replication	1.71	1.58	0.14	60.14
Thermosome,_archaeal	2.08	1	0.14	60.28
Accessory_colonization_factor	0	1.57	0.14	60.42
Sulfate_assimilation	7.79	9.03	0.14	60.55
RNA_polymerase_bacterial	26.91	25.48	0.14	60.69
CBSS-290633.1.peg.1906	6.46	4.9	0.14	60.83
CBSS-52598.3.peg.2843	3.29	2	0.14	60.96
Ribitol,_Xylitol,_Arabitol,_Mannitol_and_Sorbitol_utilization	13.64	12.18	0.14	61.1
L-2-amino-thiazoline-4-carboxylic_acid-Lcysteine_conversion	4.05	2.5	0.14	61.23
Transport_of_Molybdenum	4.06	2.51	0.14	61.37
Photosystem_I	3.76	4.83	0.13	61.5
CBSS-306254.1.peg.1508	10.91	9.38	0.13	61.64
Twin-arginine_translocation_system	11.9	10.37	0.13	61.77
CBSS-316057.3.peg.1294	11.64	13.17	0.13	61.91
Type_4_conjugative_transfer_system,_IncI1_type	2.74	1.21	0.13	62.04
TrmE_experimental	21.69	20.69	0.13	62.17
COG1272_Experimental	4.89	6.4	0.13	62.3
Folate_transporters	5.86	7.37	0.13	62.43
Major_Outer_Membrane_Proteins	10.49	12	0.13	62.57
Conjugative_transposon,_Bacteroidales	2.37	0.87	0.13	62.7
ABC_transporter_alkylphosphonate_(TC_3.A.1.9.1)	8.22	7.07	0.13	62.83
MukBEF_Chromosome_Condensation	1.5	0	0.13	62.96
C_jejuni_colonization_of_chick_caeca	2	0.5	0.13	63.09
Flagellum	23.7	22.39	0.13	63.22
Bacterial_cyanide_production_and_tolerance_mechanisms	0.71	2.19	0.13	63.35
CBSS-335283.3.peg.454	24.61	23.13	0.13	63.48
Polysaccharide_deacetylases	1.62	3.1	0.13	63.61
Tn552	2.71	3.18	0.13	63.73
CBSS-176299.4.peg.1292	22.55	24.02	0.13	63.86
Phenylpropanoid_compound_degradation	11.49	10.02	0.13	63.99
Widespread_colonization_island	7.28	5.82	0.13	64.12
L-fucose_utilization_temp	8.49	9.95	0.13	64.24
Pterin_biosynthesis	3.29	3.86	0.13	64.37
CBSS-138119.3.peg.2719	16.66	15.21	0.13	64.5
Phosphoenolpyruvate_phosphomutase	4.36	2.91	0.13	64.62
CBSS-269482.1.peg.1294	13.85	12.45	0.13	64.75
ABC_transporter_tungstate_(TC_3.A.1.6.2)	7.08	5.89	0.12	64.87
Copper_homeostasis	19.83	19.32	0.12	65
Universal_stress_protein_family	2.8	4.16	0.12	65.12
Hyperosmotic_ectoine_biosynthesis	2.12	0.71	0.12	65.24
Membrane-bound_Ni,_Fe-hydrogenase	1.41	1.73	0.12	65.37
RelBE_bacterial_toxin-antitoxin_system	0	1.41	0.12	65.49
Listeria_surface_proteins:_LPXTG_motif	1.41	0	0.12	65.61
Cytolysin_and_Lipase_operon_in_Vibrio	1.41	1.21	0.12	65.74
Fatty_acid_degradation_regulons	8.69	7.28	0.12	65.86
tRNA_aminoacylation	56.82	57.44	0.12	65.98
Serotype_determining_Capsular_polysaccharide_biosynthesis_in_Staphylococcus	2.12	3.53	0.12	66.11
Acyclic_terpenes_utilization	8.03	7.85	0.12	66.23
Carbon_Starvation	6.29	5.91	0.12	66.35
GABA_and_putrescine_metabolism_from_cluters	12.15	10.84	0.12	66.47
Polyhydroxybutyrate_metabolism	14.8	13.44	0.12	66.59
Vibrio_Polysaccharide_(VPS)_Biosynthesis	4.08	5.36	0.12	66.71
Terminal_cytochrome_C_oxidases	23.67	25.05	0.12	66.83
CBSS-258594.1.peg.613	17.52	18.17	0.12	66.95
CBSS-292415.3.peg.2341	7.74	6.53	0.12	67.07
CBSS-221988.1.peg.2137	10.25	11.62	0.12	67.19
tRNA_splicing	1.37	0	0.12	67.31
Cholera_toxin	0	1.37	0.12	67.43
Cluster_Ytf_and_putative_sugar_transporter	6.12	7.48	0.12	67.55
Methanogenesis_from_methylated_compounds	2.98	1.62	0.12	67.66
Bacterial_Endolysins:_autolysins,_phage,_and_phage-like_lysins	2.51	3.56	0.12	67.78
CBSS-84588.1.peg.1247	1.98	2.77	0.12	67.9
Hexose_Phosphate_Uptake_System	2.55	3.89	0.12	68.02
CBSS-176279.3.peg.1262	3.16	1.82	0.12	68.13
tRNA_modification_E.coli	28.46	27.7	0.12	68.25
Ribosome_activity_modulation	4.61	5.68	0.12	68.37
Superpathway_of_cysteine_biosynthesis	3.87	5.19	0.12	68.48
Quorum_sensing_in_Yersinia	2.03	0.71	0.12	68.6
Pyruvate_metabolism_I:_anaplerotic_reactions,_PEP	24.65	23.79	0.11	68.71
CBSS-393123.3.peg.1754	3.41	4.73	0.11	68.83
NiFe_hydrogenase_maturation	3.05	2.5	0.11	68.94
Phosphate_metabolism	42.52	43.83	0.11	69.05
Transcription_initiation,_bacterial_sigma_factors	18.03	16.71	0.11	69.17
ABC_transporter_ferrichrome_(TC_3.A.1.14.3)	5.48	6.34	0.11	69.28
Rubrerythrin	2.08	2.8	0.11	69.4
Lipopolysaccharide_assembly	16.81	15.51	0.11	69.51
Na(+)_H(+)_antiporter	11.04	12.12	0.11	69.62
ABC_transporter_L-proline_glycine_betaine_(TC_3.A.1.12.1)	2	0.71	0.11	69.74
Protocatechuate_branch_of_beta-ketoadipate_pathway	6.95	7.38	0.11	69.85
DNA_Helicase_of_Unknown_Function	2.71	2.12	0.11	69.96
Proline_Synthesis	8.11	9.4	0.11	70.07
Proline,_4-hydroxyproline_uptake_and_utilization	22.03	23.32	0.11	70.19
Methanopterin_biosynthesis2	1.98	0.71	0.11	70.3
Exopolysaccharide_Biosynthesis	4.11	4.06	0.11	70.41
CBSS-312309.3.peg.1965	13.96	13.21	0.11	70.52
Methylglyoxal_Metabolism	7.11	6.06	0.11	70.63
DNA_topoisomerases,_Type_II,_ATP-dependent	13.9	12.98	0.11	70.74
N-linked_Glycosylation_in_Bacteria	11.22	10.95	0.11	70.85
ABC_transporter_oligopeptide_(TC_3.A.1.5.1)	16.79	15.79	0.11	70.96
CBSS-320372.3.peg.6046	10.39	9.14	0.11	71.07
Transport_of_Zinc	15.96	14.71	0.11	71.18
RuvABC_plus_a_hypothetical	15.65	16.9	0.11	71.29
Transport_of_Nickel_and_Cobalt	6.48	6.63	0.11	71.4
YHI9	6.31	7.45	0.11	71.5
Conserved_gene_cluster_associated_with_Met-tRNA_formyltransferase	19.14	20.38	0.11	71.61
Aromatic_amino_acid_degradation	7.2	7.87	0.11	71.72
CO_Dehydrogenase	5.69	4.45	0.11	71.83
Flavanone_biosynthesis	3.81	5.05	0.11	71.94
Pyrroloquinoline_Quinone_biosynthesis	10.29	9.05	0.11	72.04
Cyanophycin_metabolism	0.5	1.73	0.11	72.15
Protection_from_Reactive_Oxygen_Species	5.66	6.89	0.11	72.26
RNA_polymerase_III	2.64	3.38	0.11	72.37
CBSS-243265.1.peg.4415	1.72	0.87	0.11	72.47
Bacterial_light-harvesting_proteins	1.22	0.71	0.11	72.58
Ribosome_SSU_chloroplast	1.21	1.22	0.11	72.69
Integrons	2.45	3.67	0.11	72.79
Fructose_utilization	5.74	4.53	0.11	72.9
Rrf2_family_transcriptional_regulators	0	1.21	0.11	73
Streptococcus_pyogenes_virulence_regulators	0	1.21	0.11	73.11
Lacto-N-Biose_I_and_Galacto-N-Biose_Metabolic_Pathway	0	1.21	0.11	73.22
Protein_chaperones	25.07	23.87	0.1	73.32
Terminal_cytochrome_oxidases	7.52	7.17	0.1	73.42
Periplasmic_Stress_Response	12.98	13.84	0.1	73.53
CBSS-323097.3.peg.2594	10.41	11.6	0.1	73.63
Oxidative_stress	20.83	21.32	0.1	73.74
CBSS-630.2.peg.3360	17.12	16.45	0.1	73.84
pyrimidine_conversions	25.36	26.54	0.1	73.94
Lipid_A_modifications	5.79	4.8	0.1	74.04
Polyadenylation_bacterial	8.86	7.68	0.1	74.15
Phage_shock_protein_(psp)_operon	5	5.53	0.1	74.25
CBSS-243277.1.peg.4359	13.43	12.27	0.1	74.35
Chloroaromatic_degradation_pathway	1.87	0.71	0.1	74.45
Chlorophyll_Degradation	1.87	0.71	0.1	74.55
Phenylalanine_and_Tyrosine_Branches_from_Chorismate	12.64	11.49	0.1	74.65
Proteasome_bacterial	26.84	25.82	0.1	74.75
Gentisare_degradation	4.83	5.5	0.1	74.85
Teichuronic_acid_biosynthesis	8.3	9.43	0.1	74.95
CBSS-323850.3.peg.3269	14.4	15.53	0.1	75.05
Mannitol_Utilization	6.18	7.3	0.1	75.15
RNA_polymerase_archaeal_initiation_factors	1.83	0.71	0.1	75.24
Nucleolar_protein_complex	0.5	1.12	0.1	75.34
n-Phenylalkanoic_acid_degradation	3.46	4.58	0.1	75.44
Staphylococcus_aureus_hypothetical_repetitive_gene_loci	1.57	1.12	0.1	75.54
Prophage_lysogenic_conversion_modules	0.87	1.62	0.1	75.64
Tocopherol_Biosynthesis	1.41	1.12	0.1	75.73
2-Ketogluconate_Utilization	1.12	0.5	0.1	75.83
Siderophore_pyochelin	1	1.83	0.1	75.93
Control_of_Swarming_in_Vibrio_and_Shewanella_species	1.12	0.87	0.1	76.03
Pseudomonas_quinolone_signal_PQS	1.12	0	0.1	76.12
gram_plus_late_competence	1	1.83	0.1	76.22
RNA_polymerase_III_initiation_factors	0.71	1.62	0.1	76.32
RNA_3&#39;-terminal_phosphate_cyclase	0.71	1.12	0.1	76.41
Adhesins_in_Staphylococcus	0.71	1.12	0.1	76.51
Aromatic_amino_acid_interconversions_with_aryl_acids	7.84	6.9	0.1	76.61
CBSS-251221.1.peg.1863	12.16	12.28	0.1	76.7
Mercury_resistance_operon	2.03	2.8	0.1	76.8
Denitrification	2.51	2.82	0.1	76.9
Catechol_branch_of_beta-ketoadipate_pathway	14.22	13.34	0.09	76.99
NAD_and_NADP_cofactor_biosynthesis_global	25.69	25.35	0.09	77.09
Tryptophan_synthesis	19.95	20.69	0.09	77.18
Xylose_utilization	12.75	13.34	0.09	77.27
Cresol_degradation	2.29	1.5	0.09	77.37
CBSS-83333.1.peg.946	7.64	7.77	0.09	77.46
Biogenesis_of_c-type_cytochromes	19.37	18.53	0.09	77.56
CBSS-196164.1.peg.461	10.24	9.68	0.09	77.65
Carbonate_Biomineralization	3.29	2.8	0.09	77.74
Transport_of_Iron	17.01	17.32	0.09	77.84
CBSS-176279.3.peg.868	13.8	14.54	0.09	77.93
RNA_polymerase_archaeal	2.44	3.3	0.09	78.02
cAMP_signaling_in_bacteria	21.68	20.62	0.09	78.12
Na+_translocating_decarboxylases_and_related_biotin-dependent_enzymes	8.28	7.6	0.09	78.21
General_Secretion_Pathway	11.55	10.7	0.09	78.3
Flavohaemoglobin	11.46	10.41	0.09	78.39
Orphan_regulatory_proteins	4.36	3.31	0.09	78.48
Fatty_Acid_Biosynthesis_FASII	32.13	31.28	0.09	78.57
Ribonucleotide_reduction	23.23	22.35	0.09	78.66
Trehalose_Biosynthesis	7.3	8.33	0.09	78.75
Benzoate_catabolism	2.85	2.44	0.09	78.84
Photosystem_II-type_photosynthetic_reaction_center	5.55	5.26	0.09	78.93
DNA-binding_regulatory_proteins,_strays	6.89	5.87	0.09	79.02
Citrate_Metabolism,_Transport,_and_Regulation	1.73	0.71	0.09	79.11
(GlcNAc)2_Catabolic_Operon	1.71	2.44	0.09	79.2
CBSS-393123.3.peg.2365	4.02	5.04	0.09	79.29
Type_III_secretion_system_orphans	6.12	6.16	0.09	79.38
Benzoate_transport_and_degradation_cluster	5.14	4.69	0.09	79.46
Dehydrogenase_complexes	27.01	28.03	0.09	79.55
DNA_repair,_UvrABC_system	29.64	30.65	0.09	79.64
Capsular_heptose_biosynthesis	8.43	7.42	0.09	79.73
D-Galacturonate_Utilization	6.63	5.62	0.09	79.82
Rhamnose_containing_glycans	16.17	16.9	0.09	79.91
D-allose_utilization	0	1	0.09	79.99
Lysine_biosynthesis_AAA_pathway_2	1.5	0.71	0.09	80.08
Purine_nucleotide_synthesis_regulator	1.5	0.87	0.09	80.17
Regulation_of_Oxidative_Stress_Response	1.5	0.5	0.09	80.26
Sortase	1.37	1	0.09	80.34
Heme_biosynthesis_orphans	1	0	0.09	80.43
Rad50-Mre11::SbcD-SbcC_DNA_Repair_Module	1	0	0.09	80.52
Coenzyme_F420-H2_dehydrogenase_(methanophenazine)	1.21	1	0.09	80.6
Adhesion_of_Campylobacter	2	2.91	0.09	80.69
CBSS-320388.3.peg.3759	1	1	0.09	80.78
DNA_repair_and_recombination_eukaryotic	0	1	0.09	80.87
Formate_dehydrogenase	1	0	0.09	80.95
Archaeal_membrane_bound_hydrogenases	1	0	0.09	81.04
Carbon_monoxide_dehydrogenase_maturation_factors	0	1	0.09	81.13
Flavocytochrome_C	0	1	0.09	81.21
Betaine_biosynthesis_from_glycine	0	1	0.09	81.3
CBSS-87626.3.peg.3639	1	0	0.09	81.39
ESAT-6_proteins_secretion_system_in_Actinobacteria	1	0	0.09	81.48
Tricarballylate_Utilization	1	1.57	0.09	81.56
Teicoplanin-resistance_in_Staphylococcus	1.71	0.71	0.09	81.65
CBSS-228410.1.peg.134	20.96	19.96	0.09	81.74
Periplasmic_Acid_Stress_Response_in_Enterobacteria	0	1	0.09	81.82
Siderophore_Yersiniabactin_Biosynthesis	0	1	0.09	81.91
DNA_structural_proteins,_bacterial	10.71	9.72	0.09	82
rRNA_modification_Bacteria	7.44	8.36	0.09	82.08
Biogenesis_of_cbb3-type_cytochrome_c_oxidases	5.45	4.73	0.09	82.17
Lipoprotein_Biosynthesis	12.47	12.74	0.09	82.25
CR_clusters_Euk_7_GlucoseP_isomerase	5.65	4.67	0.09	82.34
Late_competence	4.5	5.36	0.08	82.42
PnuC-like_transporters	3.03	3.68	0.08	82.51
Arginine_Biosynthesis_extended	7.55	6.72	0.08	82.59
Ribosome_LSU_eukaryotic_and_archaeal	2.98	2.03	0.08	82.67
YrdC-YciO	12.09	11.27	0.08	82.76
Redox-dependent_regulation_of_nucleus_processes	5.77	6.33	0.08	82.84
Peptidyl-prolyl_cis-trans_isomerase	12.59	13.54	0.08	82.92
CBSS-224911.1.peg.435	13.12	13.67	0.08	83
Lactose_and_Galactose_Uptake_and_Utilization	14.87	15.72	0.08	83.09
Acriflavin_resistance_cluster	24.14	23.64	0.08	83.17
Putative_sugar_ABC_transporter_(ytf_cluster)	3.74	2.94	0.08	83.25
Ribosome_SSU_eukaryotic_and_archaeal	2.45	2.8	0.08	83.33
Ammonia_assimilation	16.07	15.88	0.08	83.41
Fatty_Acid_Biosynthesis_FASI	1.71	2.64	0.08	83.5
Hypothetical_Coupled_to_RecF	2.44	3.37	0.08	83.58
Pterin_metabolism_3	19.82	18.9	0.08	83.66
N-Acetyl-Galactosamine_and_Galactosamine_Utilization	2.55	3.46	0.08	83.74
DNA-replication	42.29	42.7	0.08	83.82
Capsular_Polysaccharide_Biosynthesis_in_Vibrio	0.5	1.41	0.08	83.9
Lysine_Biosynthesis_DAP_Pathway	32.97	33.85	0.08	83.98
Conserved_gene_cluster_possibly_involved_in_RNA_metabolism	6.07	6.74	0.08	84.05
Thioredoxin-disulfide_reductase	19.92	20.51	0.08	84.13
Putative_hemin_transporter	10.93	10.02	0.08	84.21
Ribosome_SSU_bacterial	25.77	25.07	0.08	84.29
Glyoxylate_Synthesis	7.65	8.54	0.08	84.37
CBSS-257314.1.peg.488	15.55	16.13	0.08	84.45
CBSS-269801.1.peg.1715	6.97	6.45	0.08	84.53
L-rhamnose_utilization	7.21	6.32	0.08	84.6
Phenazine_biosynthesis	2.03	2.91	0.08	84.68
CBSS-222523.1.peg.3937	5.83	5.31	0.08	84.76
ABC_transporter_Iron_(II)_and_Manganese	3.87	3	0.08	84.83
CBSS-354.1.peg.2917	7.68	7.12	0.08	84.91
Autoinducer_2_(AI-2)_transport_and_processing_(lsrACDBFGE_operon)	2.41	2.29	0.08	84.99
p-Hydroxybenzoate_degradation	2.45	1.57	0.08	85.06
Heme,_hemin_uptake_and_utilization_systems_in_GramPositives	4.87	5.43	0.08	85.14
Leucine_Degradation_and_HMG-CoA_Metabolism	4.32	5.19	0.08	85.21
MexE-MexF-OprN_Multidrug_Efflux_System	3.1	2.66	0.08	85.29
Capsular_Polysaccharide_(CPS)_of_Campylobacter	1.37	2.24	0.08	85.37
CBSS-216592.1.peg.3534	1.57	0.71	0.08	85.44
CBSS-269801.1.peg.2186	1.57	0.71	0.08	85.52
CBSS-257314.1.peg.752	8.24	7.4	0.08	85.59
PA0057_cluster	1.37	0.5	0.08	85.67
Toxin_co-regulated_pilus	1.21	0.87	0.08	85.74
Wyeosine-MimG_Biosynthesis	0.87	0	0.08	85.82
Mebrane_bound_hydrogenases	0.87	1.57	0.08	85.9
CBSS-196620.1.peg.2477	0.87	1.37	0.08	85.97
p-Aminobenzoyl-Glutamate_Utilization	0.71	1.37	0.08	86.05
D-Alanyl_Lipoteichoic_Acid_Biosynthesis	0.87	1	0.08	86.12
Coagulation_cascade	0.87	1	0.08	86.2
CRnot_mitoch_clusters_Euk_1	2.6	2.74	0.08	86.27
Ribosome_LSU_chloroplast	0.87	1.57	0.08	86.35
YaaA	7.71	8.57	0.08	86.42
Glyoxylate_bypass	6.32	5.53	0.08	86.5
A_Hypothetical_Protein_Related_to_Proline_Metabolism	0.5	0.87	0.08	86.57
Coenzyme_F420_synthesis	0	0.87	0.08	86.65
Staphylococcal_phi-Mu50B-like_prophages	0	0.87	0.08	86.73
Anaerobic_respiratory_reductases	19.1	19.96	0.08	86.8
Hexitol_degradation	13.74	13.4	0.07	86.87
Lipid_A-Ara4N_pathway_(_Polymyxin_resistance_)	12.34	12.06	0.07	86.95
Translation_elongation_factor_G_family	7.07	7.7	0.07	87.02
D-galactonate_catabolism	4.08	3.23	0.07	87.1
Curli_production	2.41	1.57	0.07	87.17
Hemin_transport_system	7.31	6.47	0.07	87.24
Glycine_reductase,_sarcosine_reductase_and_betaine_reductase	6.58	7.41	0.07	87.31
Phosphorylcholine_incorporation_in_LPS	3.23	4.06	0.07	87.39
Purine_Utilization	15.35	14.98	0.07	87.46
tRNA_nucleotidyltransferase	8.34	7.52	0.07	87.53
Octadecanoids	2.03	1.21	0.07	87.6
Inorganic_Sulfur_Assimilation	10.88	11.7	0.07	87.67
Bacterial_Cytoskeleton	37.43	38.14	0.07	87.75
EC49-61	11.55	11.86	0.07	87.82
Sulfate_reduction-associated_complexes	2.32	1.5	0.07	87.89
Methicillin_resistance_in_Staphylococci	2.85	3.52	0.07	87.96
YeiH	3.74	2.92	0.07	88.03
Coenzyme_A_Biosynthesis	26.43	26.54	0.07	88.1
Nudix_proteins_(nucleoside_triphosphate_hydrolases)	12.21	11.4	0.07	88.17
Melibiose_Utilization	2.12	2.8	0.07	88.24
ABC_transporter_glutamate_aspartate_(TC_3.A.1.3.4)	3.13	2.5	0.07	88.31
Experimental-FO	7.84	7.04	0.07	88.38
Phytochromes	4.68	5.2	0.07	88.45
Lysine_degradation	12.8	13.38	0.07	88.52
USS-DB-6	3.24	2.8	0.07	88.59
CBSS-316407.3.peg.1371	10.79	10.16	0.07	88.66
Bacterial_hemoglobins	2.21	1.73	0.07	88.73
Fructooligosaccharides(FOS)_and_Raffinose_Utilization	2.66	2.09	0.07	88.8
Succinate_dehydrogenase	15.79	15.54	0.07	88.87
EC699-706	21.77	22.34	0.07	88.94
Competence_or_DNA_damage-inducible_protein_CinA_and_related_protein_families	18.15	17.38	0.07	89.01
CBSS-316407.3.peg.2816	4.51	3.74	0.07	89.07
Ketoisovalerate_oxidoreductase	4.06	4.83	0.07	89.14
Copper_homeostasis:_copper_tolerance	4.89	5.66	0.07	89.21
Cysteine_Biosynthesis	15.78	16.34	0.07	89.27
Resistance_to_fluoroquinolones	26.16	25.67	0.07	89.34
carnitine_metabolism	2.64	3.39	0.07	89.4
Selenoprotein_O	9.89	9.34	0.07	89.47
CBSS-342610.3.peg.1536	8.03	7.29	0.07	89.53
YcfH	8.86	8.69	0.07	89.6
L-Arabinose_utilization	7.75	8.42	0.06	89.66
Iron-sulfur_cluster_assembly	19.15	19.44	0.06	89.73
Archaeal_lipids	3.31	2.58	0.06	89.79
Caffeic_acid_derivatives	3.05	2.66	0.06	89.86
General_secretory_pathway_(Sec-SRP)_complex_(TC_3.A.5.1.1)	26.79	26.33	0.06	89.92
CBSS-288681.3.peg.1039	2.73	3.15	0.06	89.98
Serine_Biosynthesis	19.31	18.58	0.06	90.05
rRNA_modification_Haloferax	2.09	1.62	0.06	90.11
ABC_transporter_iron(III)_dicitrate_(TC_3.A.1.14.1)	1.62	1.93	0.06	90.17
Central_meta-cleavage_pathway_of_aromatic_compound_degradation	12.08	11.93	0.06	90.24
A_Glutathione-dependent_Thiol_Reductase_Assoiated_with_a_Step_in_Lysine_Biosynthesis	3.46	2.74	0.06	90.3
Alkanesulfonate_assimilation	10.72	11.04	0.06	90.36
MLST	4.18	3.87	0.06	90.43
coenzyme_M_biosynthesis	2.45	2.28	0.06	90.49
Xanthan_Exopolysaccharide_Biosynthesis_and_Export	0	0.71	0.06	90.55
CBSS-412883.3.peg.390	0	0.71	0.06	90.61
Tannin_biosynthesis	1.21	0.71	0.06	90.67
p-cymene_degradation	1.21	0.5	0.06	90.74
P38_MAP_kinase_pathways	1.21	0.5	0.06	90.8
Siderophore_biosynthesis_in_Staphylococci	0.5	1.21	0.06	90.86
Archaeal_Flagellum	0.5	0.71	0.06	90.92
Anthrose_Biosynthesis	0.71	0	0.06	90.98
Pterin_carbinolamine_dehydratase	0.71	0	0.06	91.04
Sucrose-specific_PTS	0.71	0	0.06	91.11
Reductive_Dechlorination	0.71	0	0.06	91.17
Steroid_sulfates	0.71	0	0.06	91.23
L-ascorbate_utilization_(and_related_gene_clusters)	0.71	1.21	0.06	91.29
Type_VI_secretion_systems	2.12	2.45	0.06	91.35
Sex_pheromones_in_Enterococcus_faecalis_and_other_Firmicutes	2.12	1.83	0.06	91.41
Translation_elongation_factors_eukaryotic_and_archaeal	2.12	1.83	0.06	91.48
Cinnamic_Acid_Degradation	0.71	0.71	0.06	91.54
Fructose_and_Mannose_Inducible_PTS	0.71	0.71	0.06	91.6
MazEF_toxin-antitoxing_(programmed_cell_death)_system	0.71	0.71	0.06	91.66
Alpha-Amylase_locus_in_Streptocococcus	0.71	0.5	0.06	91.72
Bacilysin_biosynthesis	0.71	0.5	0.06	91.78
carbazol_degradation_cluster	0.71	0.5	0.06	91.85
VieSAB_signal_transduction_system_of_Vibrio	0.71	0.5	0.06	91.91
The_mdtABCD_multidrug_resistance_cluster	0.71	0	0.06	91.97
CBSS-159087.4.peg.2189	0.5	0.71	0.06	92.03
CBSS-237727.3.peg.501	0.5	0.71	0.06	92.09
P_uptake_(cyanobacteria)	0.5	0.71	0.06	92.15
Multiple_Antibiotic_Resistance_MAR_locus	0.5	0.71	0.06	92.22
Biofilm_formation_in_Staphylococcus	1	0.71	0.06	92.28
N-heterocyclic_aromatic_compound_degradation	1.21	0.5	0.06	92.34
Luciferases	1.21	0.5	0.06	92.4
Streptococcus_pyogenes_recombinatorial_zone	1.21	0.71	0.06	92.46
ABC_transporter_molybdenum_(TC_3.A.1.8.1)	0	0.71	0.06	92.52
Sodium_Hydrogen_Antiporter	2.12	2.82	0.06	92.58
Potassium_homeostasis	17.64	17.85	0.06	92.65
Proteorhodopsin	9.11	9.75	0.06	92.71
D-gluconate_and_ketogluconates_metabolism	15.21	14.52	0.06	92.77
Chorismate:_Intermediate_for_synthesis_of_PAPA_antibiotics,_PABA,_anthranilate,_3-hydroxyanthranilate_and_more.	19.66	19.35	0.06	92.83
CBSS-235.1.peg.567	17.2	16.58	0.06	92.88
Iron_acquisition_in_Vibrio	10.46	9.9	0.06	92.94
Glycine_cleavage_system	23.57	22.89	0.06	93
Pyoverdine_biosynthesis_new	6.71	7.38	0.06	93.06
Di-Inositol-Phosphate_biosynthesis	5.67	5.45	0.06	93.12
Lipoic_acid_metabolism	13.81	14.42	0.06	93.18
Tolerance_to_colicin_E2	3.3	2.64	0.06	93.24
Experimental-PTPS	4.91	4.3	0.06	93.29
methanopterin_biosynthesis	1.87	1.21	0.06	93.35
Quorum-sensing_in_Vibrio	1.87	1.21	0.06	93.41
CBSS-243265.1.peg.3592	1.21	1.87	0.06	93.47
Proteasome_eukaryotic	2.7	2.66	0.06	93.52
Ribosome_SSU_mitochondrial	1.87	1.21	0.06	93.58
Bacitracin_Stress_Response	2.66	2.22	0.06	93.64
D-Sorbitol(D-Glucitol)_and_L-Sorbose_Utilization	3.07	2.41	0.06	93.7
CBSS-243265.1.peg.198	3.38	3.82	0.06	93.75
Quinate_degradation	4.3	4.95	0.06	93.81
LOS_core_oligosaccharide_biosynthesis	12.11	11.66	0.06	93.87
Cobalamin_synthesis	4.25	4.24	0.06	93.92
Resistance_to_Vancomycin	2.09	2.37	0.06	93.98
Serine-glyoxylate_cycle	42.44	43.06	0.05	94.03
Rhamnolipids_in_Pseudomonas	3.58	3.62	0.05	94.09
CytR_regulation	1.62	1.83	0.05	94.14
Cyanate_hydrolysis	2.45	2.03	0.05	94.19
Sporulation-related_Hypotheticals	1.37	1.62	0.05	94.25
HPr_catabolite_repression_system	2.22	2.03	0.05	94.3
CBSS-393133.3.peg.2787	2.03	2	0.05	94.36
Carbon_monoxide_induced_hydrogenase	3.79	4.41	0.05	94.41
Motility_of_Campylobacter	2.85	3.39	0.05	94.46
Naphtalene_and_antracene_degradation	4.55	4.12	0.05	94.52
Campylobacter_Iron_Metabolism	9.03	9.24	0.05	94.57
De_Novo_Purine_Biosynthesis	33.7	33.09	0.05	94.62
De_Novo_Pyrimidine_Synthesis	26.82	26.44	0.05	94.67
Periplasmic_disulfide_interchange	13.8	13.2	0.05	94.73
PQQ-dependent_quinoprotein_dehydrogenases	11.5	11.27	0.05	94.78
CBSS-393124.3.peg.2657	3.87	4.46	0.05	94.83
Two-component_regulatory_systems_in_Campylobacter	3.41	3.08	0.05	94.88
Tetrathionate_respiration	1.87	2.45	0.05	94.93
D-galactarate,_D-glucarate_and_D-glycerate_catabolism	2.88	3.3	0.05	94.98
Colanic_acid_biosynthesis	6.39	6.96	0.05	95.03
CBSS-296591.1.peg.2330	23.09	23.65	0.05	95.08
CBSS-265072.7.peg.546	7.27	7.12	0.05	95.13
CO2_uptake,_carboxysome	10.07	10.63	0.05	95.18
CBSS-393121.3.peg.2760	30	29.74	0.05	95.23
Embden-Meyerhof_and_Gluconeogenesis_Archaeal	15.19	15.26	0.05	95.28
Murein_hydrolase_regulation_and_cell_death	4.78	5.03	0.05	95.33
Pyridoxin_(Vitamin_B6)_Biosynthesis	18.07	18.44	0.05	95.37
Protein_secretion_by_ABC-type_exporters	2.53	2.28	0.05	95.42
Erythritol_utilization	2.41	1.87	0.05	95.47
High_affinity_phosphate_transporter_and_control_of_PHO_regulon	5.56	6.02	0.05	95.52
Transcription_factors_bacterial	22.77	22.47	0.05	95.56
D-Tagatose_and_Galactitol_Utilization	3.81	3.7	0.05	95.61
One-carbon_metabolism_by_tetrahydropterines	5.87	6.31	0.05	95.66
Phosphonate_metabolism	3.29	3.35	0.05	95.7
Selenocysteine_metabolism	7.8	7.35	0.05	95.75
CMP-N-acetylneuraminate_Biosynthesis	12.18	11.74	0.05	95.79
Teichoic_and_lipoteichoic_acids_biosynthesis	11.52	11.33	0.05	95.84
Iojap	9.32	9.84	0.05	95.88
Nitrosative_stress	1.57	2.09	0.05	95.93
CRISPRs	1.93	2.09	0.05	95.98
Putative_sulfate_assimilation_cluster	1.93	1.71	0.05	96.02
Phenylacetate_pathway_of_aromatic_compound_degradation	17.23	16.76	0.04	96.06
Leucine_Biosynthesis	0	0.5	0.04	96.11
Threonine_anaerobic_catabolism_gene_cluster	0	0.5	0.04	96.15
linker_unit-arabinogalactan_synthesis	0	0.5	0.04	96.2
NAD_consumption	0	0.5	0.04	96.24
Archease2	0	0.5	0.04	96.28
MT1-MMP_Pericellular_Network	0	0.5	0.04	96.33
Oxygen_and_light_sensor_PpaA-PpsR	2.22	2.62	0.04	96.37
Regulatory_Intramembrane_Proteolysis_Pathways	2.41	2.91	0.04	96.41
CR_clusters_Euk_1	3.3	3.58	0.04	96.46
Pyrrolysine	1.71	1.37	0.04	96.5
Unknown_sugar_utilization_(cluster_yphABCDEFG)	0.5	0	0.04	96.55
CBSS-393131.3.peg.612	0.5	0	0.04	96.59
NusA-TFII_Cluster	0.5	0	0.04	96.63
ABC_transporter_of_unknown_substrate_X	0.5	0	0.04	96.68
Cryptic_ferrous_iron_transporter_EfeUOB	0.5	0	0.04	96.72
Phosphoglycerate_transport_system	0.5	0	0.04	96.76
HtrA_and_Sec_secretion	0.5	0	0.04	96.81
RNA_polymerase_I	0.5	0	0.04	96.85
Bacteriocin-like_peptides_Blp	0.5	0	0.04	96.89
pH_adaptation_potassium_efflux_system	0.5	0	0.04	96.94
Clavulanic_acid_biosynthesis	0.5	0	0.04	96.98
Biflavanoid_biosynthesis	0.5	0	0.04	97.02
Phytosterol_biosynthesis	0.5	0	0.04	97.07
Suberine_biosynthesis	0.5	0	0.04	97.11
Quorum_sensing_regulation_in_Pseudomonas	0.5	0	0.04	97.16
Streptococcal_Mga_Regulon	0.5	0	0.04	97.2
USS-DB-2	0.5	0	0.04	97.24
Type_III_secretion_system	0.5	0	0.04	97.29
Propanediol_utilization	0.5	0.5	0.04	97.33
LMPTP_YwlE_cluster	0.5	0.5	0.04	97.37
Protein_Acetylation_and_Deacetylation_in_Bacteria	0.5	0.5	0.04	97.42
CBSS-257314.1.peg.676	0.5	0.5	0.04	97.46
Signal_peptidase	0.5	0.5	0.04	97.5
CR_clusters_Euk_4	0.5	0.5	0.04	97.55
Phenylalanine_synthesis	0.5	0	0.04	97.59
Pyruvate:ferredoxin_oxidoreductase	0.5	0	0.04	97.64
CBSS-262719.3.peg.410	0.5	0	0.04	97.68
Nucleoside_triphosphate_pyrophosphohydrolase_MazG	0.5	0	0.04	97.72
Energy-conserving_hydrogenase_(ferredoxin)	0.5	0	0.04	97.77
Anthocyanin_biosynthesis	0.5	0	0.04	97.81
USS-DB-1	0.5	0	0.04	97.85
tRNA_aminoacylation,_mitochondrial	1.71	1.37	0.04	97.9
ABC_transporter_peptide_(TC_3.A.1.5.5)	3.66	3.37	0.04	97.94
CBSS-370552.3.peg.1240	0	0.5	0.04	97.98
Gram_Positive_Competence	0	0.5	0.04	98.03
Proteasome_archaeal	0	0.5	0.04	98.07
Salmochelin-mediated_Iron_Acquisition	0	0.5	0.04	98.11
Vibrioferrin_synthesis	0	0.5	0.04	98.16
Multidrug_efflux_pump_in_Campylobacter_jejuni_(CmeABC_operon)	0	0.5	0.04	98.2
Alkylphosphonate_utilization	8.05	8.19	0.04	98.24
A_Gammaproteobacteria_Cluster_Relating_to_Translation	7.05	6.86	0.04	98.29
SigmaB_stress_responce_regulation	5.78	5.29	0.04	98.33
Glutathione_Redox_Metabolism	17.41	17.43	0.04	98.37
Ribonuclease_H	9	9.4	0.04	98.41
UDP-N-acetylmuramate_from_Fructose-6-phosphate_Biosynthesis	14.18	13.71	0.04	98.46
TCA_Cycle	25.32	25.17	0.04	98.5
Mercuric_reductase	2.65	2.7	0.04	98.54
Auxin_biosynthesis	1.87	2.32	0.04	98.58
Methionine_Degradation	6.32	6.11	0.04	98.62
Acid_resistance_mechanisms	9.9	10.34	0.04	98.65
Multidrug_Resistance,_Tripartite_Systems_Found_in_Gram_Negative_Bacteria	2	2.44	0.04	98.69
A_Gram-positive_cluster_that_relates_ribosomal_protein_L28P_to_a_set_of_uncharacterized_proteins	3.37	3.67	0.04	98.73
YgfZ	21.07	21.42	0.04	98.77
Zinc_resistance	6.71	7.14	0.04	98.81
Nitric_oxide_synthase	5.32	4.95	0.04	98.84
Biogenesis_of_cytochrome_c_oxidases	15.1	14.68	0.04	98.88
Listeria_phi-A118-like_prophages	1.83	1.98	0.04	98.92
Cell_Division_Cluster	1.87	1.83	0.04	98.95
Perosamine_Synthesis_Vibrio	9.19	9.05	0.04	98.99
Malonate_decarboxylase	1.57	1.98	0.04	99.02
Unsaturated_Fatty_Acid_Metabolism	5.83	6.2	0.03	99.06
RNA_processing_and_degradation,_bacterial	20.6	20.47	0.03	99.09
Toluene_degradation	3.16	3.53	0.03	99.12
Glutamine,_Glutamate,_Aspartate_and_Asparagine_Biosynthesis	12.74	12.88	0.03	99.15
CBSS-221109.1.peg.2233	1.57	1.37	0.03	99.19
eukaryotic_rRNA_modification_and_related_functions	1.21	1.37	0.03	99.22
Propionyl-CoA_to_Succinyl-CoA_Module	9	8.85	0.03	99.25
Ethanolamine_utilization	2.91	2.55	0.03	99.28
V-Type_ATP_synthase	1.37	1.37	0.03	99.31
Biofilm_Adhesin_Biosynthesis	1.37	1	0.03	99.34
Glycine_Biosynthesis	12.17	12.36	0.03	99.38
Streptolysin_S_Biosynthesis_and_Transport	1	1.37	0.03	99.41
Cold_shock,_CspA_family_of_proteins	6.63	6.59	0.03	99.44
Acetone_Butanol_Ethanol_Synthesis	4.74	4.41	0.03	99.47
Osmoregulation	6.96	6.88	0.03	99.5
CBSS-160492.1.peg.550	11.59	11.49	0.03	99.52
Flavodoxin	2.44	2.12	0.03	99.55
Pyruvate_Alanine_Serine_Interconversions	14.73	14.52	0.03	99.58
CBSS-246196.1.peg.364	26.53	26.58	0.03	99.61
SA:14-24	4.05	3.94	0.03	99.63
CBSS-342610.3.peg.283	3.3	3.38	0.03	99.66
Methanogenesis	1.71	1.57	0.03	99.69
YbbK	1.73	1.71	0.03	99.71
CBSS-224911.1.peg.7673	3	2.82	0.02	99.73
Inteins	5.04	4.9	0.02	99.75
2-phosphoglycolate_salvage	4.3	4.06	0.02	99.78
Pentose_phosphate_pathway	21.78	21.68	0.02	99.8
HMG_CoA_Synthesis	7.87	7.71	0.02	99.82
Unknown_oligosaccharide_utilization_Sde_1396	5.87	5.74	0.02	99.83
CBSS-393130.3.peg.129	2.45	2.24	0.02	99.85
Triacylglycerol_metabolism	5.95	6	0.02	99.87
ATP-dependent_Nuclease	1.21	1.21	0.02	99.89
CBSS-214092.1.peg.3450	1.21	1	0.02	99.91
Tetracycline_resistance,_ribosome_protection_type	1.21	1	0.02	99.93
Transporters_In_Models	19.49	19.3	0.02	99.94
CBSS-176279.3.peg.1389	4.06	4.06	0.02	99.96
Glycerolipid_and_Glycerophospholipid_Metabolism_in_Bacteria	25.8	25.87	0.01	99.97
RNA_polymerase_II_initiation_factors	1.57	1.73	0.01	99.99
Formaldehyde_assimilation:_Ribulose_monophosphate_pathway	3.32	3.16	0.01	100
Carboxysome	0	0	0	100
Unknown_sugar_utilization_(cluster_ydeVWYZ)	0	0	0	100
Sucrose_utilization	0	0	0	100
Alpha-acetolactate_operon	0	0	0	100
Isobutyryl-CoA_to_Propionyl-CoA_Module	0	0	0	100
beta-glucuronide_utilization	0	0	0	100
Sporulation_Cluster_III_A	0	0	0	100
Spore_Coat	0	0	0	100
CBSS-222523.1.peg.1311	1	1	0	100
Coenzyme_B_synthesis	0	0	0	100
Pterin_metabolism	0	0	0	100
Pyridoxin(Vitamin_B6)_Degradation_Pathway	0	0	0	100
Ubiquinone_Biosynthesis	0	0	0	100
Small_acid-soluble_spore_proteins	0	0	0	100
Sphingolipid_biosynthesis	0	0	0	100
Glycerol_fermenation_to_1,3-propanediol	0	0	0	100
ABC_transporter_nickel_(TC_3.A.1.5.3)	0	0	0	100
Hydroxyaromatic_decarboxylase_family	0	0	0	100
Archease	0	0	0	100
Dissimilatory_nitrite_reductase	0	0	0	100
Programmed_frameshift	0	0	0	100
Ribonuclease_P_archaeal_and_eukaryal	0	0	0	100
Spliceosome	0	0	0	100
H2:CoM-S-S-HTP_oxidoreductase	0	0	0	100
Lignine_biosynthesis	0	0	0	100
Terpen_biosynthesis	0	0	0	100
Fosfomycin_resistance	0	0	0	100
Tolerance_to_Furfural-Induced_Stress	0	0	0	100
CR_clusters_Euk_2	0	0	0	100
CR_clusters_Euk_3	0	0	0	100
CR_clusters_Euk_6_lactateDehB	0	0	0	100
IbrA_and_IbrB:_co-activators_of_prophage_gene_expression	0	0	0	100
Prophage-encoded_Rst_operon	0	0	0	100
Aminoglycoside_adenylyltransferases	0	0	0	100
Multidrug_Resistance,_2-protein_version_Found_in_Gram-positive_bacteria	1	1	0	100
Streptococcus_pneumoniae_Vancomycin_Tolerance_Locus	0	0	0	100
Streptothricin_resistance	0	0	0	100
USS-DB-4	0	0	0	100
USS-DB-5	0	0	0	100
ESAT-6_proteins_secretion_system_in_Firmicutes	0	0	0	100
